# Supplementary material for: Integrating ethnobiological knowledge into biodiversity conservation in the Eastern Himalayas
Source: J Ethnobiol Ethnomed. 2017 Mar 29;13:21. doi: 10.1186/s13002-017-0148-9 (PMC5372287; doi:10.1186/s13002-017-0148-9)
Supplement: Supplementary file 2 — Reviewed species with ethnobiological records, including rank values, distributional data, ethnobiological uses. (XLSX 126 kb) [file 13002_2017_148_MOESM2_ESM.xlsx]

## Sheet: Sheet1
ID	Linnaean	Linnaean	Linnaean	Range (M ASL)		Citation	Conservation Rank		IUCN	Biocultural
#	Classification	Family	Kingdom	Low	High	Frequency	CR	SR	Status	Designation
1	Abelmoschus manihot (L.) Medik.	Malvaceae	Plantae	600	2400	0.222222	1	5	NA	FOOD, RESP, URIN
2	Abies densa Griff.	Pinaceae	Plantae	2800	3900	0.5	5	1	LC	CIRC, DERM, DGST, MTRL, ORAL, RESP, URIN, VETN
3	Abies spectabilis (D. Don) Mirb.	Pinaceae	Plantae	2400	3800	0.166667	5	1	NA	RESP
4	Abroma augusta (L.) L.f.	Malvaceae	Plantae	300	1500	0.305556	5	5	NA	CIRC, EDCR, FOOD, SKEL, PREG
5	Abrus precatorius L.	Fabaceae	Plantae	300	1500	0.305556	5	5	NA	DERM, ORAL, PREG, RESP, URIN
6	Abutilon indicum (L.) Sw.	Malvaceae	Plantae	300	1100	0.0833333	5	1	NA	EDCR
7	Acacia concinna (Willd.) DC.	Fabaceae	Plantae	300	1100	0.0833333	5	1	NA	DERM, HEPT
8	Acacia pennata (L.) Willd.	Fabaceae	Plantae	300	1500	0.111111	5	5	LC	ANTI, DERM, FOOD, SKEL
9	Acalypha indica L.	Euphorbiaceae	Plantae	350	1500	0.0833333	4	5	NA	FOOD, DGST, SKEL, URIN
10	Acampe praemorsa (Roxb.) Blatt. & McCann	Orchidaceae	Plantae	600	1600	0.0555556	5	5	NA	EDCR, SKEL
11	Acer caudatum Wall.	Sapindaceae	Plantae	2210	4000	0.0555556	5	5	NA	FOOD, MTRL
12	Acer oblongum Wall. ex DC.	Sapindaceae	Plantae	1500	2500	0.0277778	5	5	NA	MTRL
13	Achyranthes bidentata Blume	Amaranthaceae	Plantae	300	1800	0.305556	5	5	NA	DERM, DGST, SKEL, URIN
14	Acmella calva (DC.) R.K.Jansen	Asteraceae	Plantae	1000	1900	0.0277778	5	3	NA	ORAL
15	Acmella paniculata (Wall. ex DC.) R. K. Jensen	Asteraceae	Plantae	800	1900	0.0277778	5	1	LC	ORAL
16	Aconitum ferox Wall. ex Ser. var. naviculare (Brueji) Stapf.	Ranunculaceae	Plantae	3000	5000	0.611111	4	5	NA	ANTI, DERM, DGST, EDCR, RESP, SKEL, URIN
17	Aconitum palmatum D. Don.	Ranunculaceae	Plantae	2750	4800	0.305556	4	5	NA	EDCR, MTRL
18	Aconitum spicatum Stapf.	Ranunculaceae	Plantae	1800	4200	0.222222	5	5	NA	ANTI, DGST, HEAR, SKEL, RESP
19	Acorus calamus L.	Acoraceae	Plantae	600	2300	0.777778	4	5	LC	CIRC, DERM, DGST, EDCR, MENT, RESP, VETN
20	Acronychia pedunculata (L.) Miq.	Rutaceae	Plantae	600	1200	0.0555556	5	5	NA	DGST
21	Actinidia callosa Lindl.	Actinidiaceae	Plantae	1200	2700	0.0555556	5	1	NA	FOOD
22	Actinidia strigosa Hook. f. & Thomson	Actinidiaceae	Plantae	2400	3000	0.0277778	5	3	NA	FOOD
23	Actinodaphne obovata (Nees) Blume	Lauraceae	Plantae	300	1400	0.111111	5	1	NA	DERM, MTRL
24	Adiantum capillus-veneris L.	Pteridaceae	Plantae	300	2800	0.111111	3	1	LC	EDCR, URIN
25	Adiantum lunulatum Burm. f.	Pteridaceae	Plantae	300	1500	0.111111	5	1	LC	EDCR, URIN
26	Aegle marmelos (L.) Correa	Rutaceae	Plantae	300	1000	0.333333	5	7	NA	DERM, DGST, EDCR, URIN
27	Aerides odoratum Reinw. ex Blume	Orchidaceae	Plantae	300	1200	0.0555556	5	5	NA	DERM
28	Aeschynanthus parviflorus (D. Don) Spreng.	Gesneriaceae	Plantae	1200	2000	0.138889	5	1	NA	DERM
29	Aesculus indica (Wall. ex Cambess.) Hook.	Sapindaceae	Plantae	600	1800	0.111111	5	1	NA	CIRC, DERM, SKEL
30	Agapetes serpens (Wight) Sleumer	Ericaceae	Plantae	1200	2600	0.0555556	5	1	NA	FOOD
31	Agaricus augustus Fr.	Agaricaceae	Fungi	1800	2500	0.111111	1	1	NA	FOOD
32	Agaricus bisporus (J.E.Lange) Emil J. Imbach	Agaricaceae	Fungi	300	3645	0.138889	1	1	NA	FOOD
33	Agaricus campestris L.	Agaricaceae	Fungi	1800	2500	0.0833333	1	1	NA	FOOD
34	Agave americana L.	Asparagaceae	Plantae	300	2200	0.111111	2	5	NA	DERM, MTRL, SKEL, URIN
35	Ageratina adenophora (Spreng.) R. M. King & H. Rob.	Asteraceae	Plantae	900	2200	0.111111	3	1	NA	DERM, DGST
36	Ageratum conyzoides (L.) L.	Asteraceae	Plantae	300	2000	0.25	5	1	NA	DERM, DGST, NEOP, SKEL
37	Aglaia edulis (Roxb.) Wall.	Meliaceae	Plantae	700	1800	0.0277778	5	1	NT	FOOD
38	Agrimonia pilosa Ledeb.	Rosaceae	Plantae	1000	3200	0.0833333	5	5	NA	DGST
39	Agrostophyllum brevipes King & Pantl.	Orchidaceae	Plantae			0.0555556	5	5	NA	HEPT
40	Agrostophyllum callosum Rchb.f.	Orchidaceae	Plantae	900	2400	0.0555556	5	5	NA	DERM, EDCR
41	Ailurus fulgens F. Cuvier	Ailuridae	Animalia	2500	3800	0.0555556	5	6	EN	RESP
42	Ainsliaea latifolia (D. Don) Sch. Bip.	Asteraceae	Plantae	1700	3600	0.0555556	5	5	NA	DGST
43	Ajuga integrifolia Buch.-Ham.	Lamiaceae	Plantae	1000	2500	0.0277778	5	5	NA	DERM, URIN
44	Ajuga macrosperma Wall ex. Benth.	Lamiaceae	Plantae	1221	3300	0.0277778	5	5	NA	DERM
45	Alangium chinense (Lour.) Harms.	Cornaceae	Plantae	300	2400	0.0555556	5	5	NA	EDCR, FOOD
46	Albizia chinensis (Osbeck) Merr.	Fabaceae	Plantae	400	1500	0.0555556	2	1	NA	DERM, DGST, MTRL
47	Albizia julibrissin Durazz.	Fabaceae	Plantae	1500	3000	0.0277778	4	5	NA	OPTH, ORAL
48	Albizia lebbeck (L.) Benth.	Fabaceae	Plantae	300	900	0.166667	5	7	NA	CIRC, DERM, DGST, EDCR, MTRL, OPTH, RESP
49	Albizia odoratissima (L. f.) Benth.	Fabaceae	Plantae	900	1600	0.0555556	5	1	NA	MTRL, NERV, RESP
50	Albizia procera (Roxb.) Benth.	Fabaceae	Plantae	400	1200	0.111111	5	1	NA	DGST, MTRL, SKEL
51	Alcea rosea L.	Malvaceae	Plantae	300	850	0.0555556	2	3	NA	HEPT, SKEL
52	Aleuria aurantia (Pers.) Fuckel	Pyronemataceae	Fungi	1800	2500	0.0277778	5	1	NA	FOOD
53	Allantodia aspera (Blume) Ching.	Athyriaceae	Plantae	300	1200	0.0555556	5	1	NA	FOOD
54	Allantodia maximum (D. Don ) Ching	Athyriaceae	Plantae	1200	2200	0.138889	5	1	NA	FOOD
55	Allantodia succulenta (C.B. Clarke) Ching	Athyriaceae	Plantae	2200	3000	0.138889	5	1	NA	FOOD
56	Allemanda cathartica L.	Apocynaceae	Plantae	300	700	0.0555556	5	7	NA	FOOD
57	Allium cepa L.	Amaryllidaceae	Plantae	300	1800	0.5	1	5	NA	CIRC, EDCR, FOOD
58	Allium hypsistum Stearn.	Amaryllidaceae	Plantae	4500	5500	0.0555556	5	3	NA	CIRC, FOOD
59	Allium macranthum Baker	Amaryllidaceae	Plantae	2000	3500	0.0277778	5	5	NA	CIRC, FOOD, VETN
60	Allium prattii C.H. Wright	Amaryllidaceae	Plantae	2400	4500	0.0555556	5	5	NA	SKEL
61	Allium sativum L.	Amaryllidaceae	Plantae	300	1700	0.333333	1	5	NA	ANTI, DERM, DGST, EDCR, FOOD, HEAR, NERV, SPRT, VETN
62	Allium sikkimense Baker	Amaryllidaceae	Plantae	2500	4000	0.0277778	5	5	NA	EDCR, FOOD
63	Allium wallichii Kunth	Amaryllidaceae	Plantae	2200	4300	0.388889	5	1	NA	DERM, DGST, EDCR, FOOD
64	Alnus nepalensis D. Don	Betulaceae	Plantae	600	2300	0.138889	5	5	LC	DERM, DGST, EDCR, FOOD, MTRL, SPRT
65	Aloe vera (L.) Burm. f.	Xanthorrhoeaceae	Plantae	300	1500	0.388889	1	1	NA	DERM, DGST, EDCR, FOOD, MTRL, PREG, SKEL, URIN, VET
66	Alpina galanga (L.) Willd.	Zingiberaceae	Plantae	300	1300	0.0555556	5	5	NA	DERM, DGST, SPRT
67	Alstonia scholaris (L.) R. Br.	Apocynaceae	Plantae	300	1500	0.25	5	1	LC	ANTI, DERM, MTRL, PREG, RESP, SKEL, VETN
68	Alternanthera sessilis (L.) R. Br. ex DC.	Amaranthaceae	Plantae	300	2000	0.0555556	3	5	LC	DGST, URIN
69	Amanita caesarea (Scop.) Pers.	Amanitaceae	Fungi	300	2500	0.0555556	5	1	NA	FOOD
70	Amaranthus spinosus L.	Amaranthaceae	Plantae	300	1500	0.138889	3	5	NA	DGST, EDCR, PREG, URIN
71	Amaranthus tricolor L.	Amaranthaceae	Plantae	300	1200	0.111111	2	5	NA	DGST, EDCR, FOOD, PREG
72	Amaranthus viridis L.	Amaranthaceae	Plantae	300	1750	0.111111	3	5	NA	DGST, FOOD, URIN
73	Ammannia baccifera L.	Lythraceae	Plantae	300	1000	0.0555556	3	3	LC	DERM
74	Ammi majus L.	Apiaceae	Plantae	300	1200	0.0833333	2	1	NA	DGST, URIN
75	Amolops spp.	Ranidae	Animalia	-	-	0.0277778	5	5	-	DERM
76	Amomum aromaticum Roxb.	Zingiberaceae	Plantae	300	1300	0.138889	4	1	NA	DGST
77	Amomum subulatum Roxb.	Zingiberaceae	Plantae	600	2100	0.527778	4	5	NA	ANTI, CIRC, DERM, DGST, FOOD, HEPT, ORAL, RESP, URIN, VETN
78	Amorphophallus paeoniffolius (Dennst.) Nicholson	Araceae	Plantae	300	750	0.0555556	5	7	NA	MTRL
79	Ampelocissus barbata (Wall.) Planch.	Vitaceae	Plantae	500	1000	0.0555556	5	3	NA	FOOD
80	Ampelocissus sikkimensis (M.A. Lawson) Planch.	Vitaceae	Plantae	500	1500	0.0555556	5	1	NA	ORAL, VETN
81	Ampelopteris prolifera (Retz.) Copel.	Thelypteridaceae	Plantae	300	1000	0.0833333	5	4	NA	ORAL, VETN
82	Anagallis arvensis L.	Primulaceae	Plantae	500	2700	0.0555556	5	1	NA	HEPT, MENT, URIN
83	Ananas comosus (L.) Merr.	Bromeliaceae	Plantae	300	1400	0.138889	2	1	NA	CIRC, DGST, HEPT, ORAL, PREG
84	Anaphalis busua (Buch.-Ham.) DC.	Asteraceae	Plantae	1500	3600	0.0833333	3	5	NA	CIRC, DERM, DGST, MTRL
85	Anaphalis contorta (D. Don) Hook. f.	Asteraceae	Plantae	1700	4500	0.0555556	3	5	NA	DERM, RESP
86	Anaphalis margaritacea (L.) Benth. & Hook. f.	Asteraceae	Plantae	1800	3100	0.0277778	5	1	NA	CIRC, DGST, MTRL
87	Anemone obtusiloba D. Don. var. potentilloides (Camb.) Lauener	Ranunculaceae	Plantae	3200	4000	0.0277778	5	7	NA	DERM, SKEL
88	Anemone rivularis Buch-Ham. ex DC.	Ranunculaceae	Plantae	2200	3600	0.0555556	5	5	NA	DERM, SKEL, VETN
89	Anemone vitifolia Buch.-Ham. ex DC.	Ranunculaceae	Plantae	1500	3000	0.0555556	5	5	NA	DERM, DGST, EDCR
90	Angelica archangelica L.	Apiaceae	Plantae	2210	3300	0.0555556	3	1	NA	DGST
91	Angelica cyclocarpa (C. Norman) M. Hiroe	Apiaceae	Plantae	2210	3600	0.0555556	5	1	NA	DGST, NERV
92	Angelica indica Pimenov & Kljuykov	Apiaceae	Plantae	2210	3300	0.0277778	5	1	NA	OPTH, SKEL, PREG
93	Angiopteris evecta (G. Forst.) Hoffm.	Marattiaceae	Plantae	300	1200	0.0833333	5	5	NA	FOOD
94	Anguilla bengalensis J.E. Gray	Anguillidae	Animalia	300	500	0.0277778	5	7	NT	FOOD
95	Anisomeles indica (L.) Kuntze	Lamiaceae	Plantae	300	2400	0.0277778	5	1	NA	RESP
96	Annona squamosa L.	Annonaceae	Plantae	300	1200	0.0833333	2	5	NA	DERM, MENT, NERV, VETN
97	Anthogonium gracile Wall. Ex Lindl.	Orchidaceae	Plantae	1200	2500	0.0833333	5	5	NA	DERM, SKEL
98	Antidesma acidum Retz.	Phyllanthaceae	Plantae	300	1520	0.0833333	5	1	NA	DERM, DGST, FOOD, RESP
99	Antidesma montanum Blume	Phyllanthaceae	Plantae	300	1520	0.0277778	5	1	NA	FOOD
100	Apis mellifera L.	Apidae	Animalia	300	3500	0.111111	3	1	NA	CULT, DERM, FOOD, ORAL, RESP
101	Aralia leschenaultii (DC.) J. Wen	Araliaceae	Plantae	1900	3400	0.138889	5	5	NA	DERM, FOOD
102	Ardisia crispa (Thunb.) A. DC	Primulaceae	Plantae	1200	2500	0.0277778	5	1	NA	CIRC, DERM, FOOD, OPTH
103	Ardisia macrocarpa Wall.	Primulaceae	Plantae	500	2400	0.0833333	4	1	NA	DERM, FOOD, OPTH
104	Areca catechu L.	Arecaceae	Plantae	300	850	0.0277778	3	7	NA	DERM, DGST, ORAL, URIN
105	Argemone mexicana L.	Papaveraceae	Plantae	300	1500	0.0555556	3	5	NA	DERM, DGST, HEPT, VETN
106	Arisaema intermedium Blume	Araceae	Plantae	2600	3800	0.0555556	5	5	NA	FOOD
107	Arisaema nepenthoides (Wall.) Mart.	Araceae	Plantae	2100	3600	0.0277778	5	5	NA	FOOD
108	Arisaema speciosum (Wall.) Mart.	Araceae	Plantae	500	2800	0.138889	5	5	NA	DERM
109	Arisaema tortuosum (Wall.) Schott	Araceae	Plantae	800	2800	0.0833333	5	5	NA	ANTI, DERM, DGST, SKEL
110	Arisaema utile Hook. f. ex Schott	Araceae	Plantae	2700	4000	0.111111	5	5	NA	FOOD
111	Aristolochia griffithii Hook.f. & Thomson ex Duch.	Aristolochiaceae	Plantae	2100	2800	0.0277778	5	1	NA	CIRC, MTRL
112	Armillaria mellea (Vahl.) P. Kumm.	Physalacriaceae	Fungi	300	2500	0.0277778	5	1	NA	FOOD
113	Artemisia dubia L. ex B.D. Jacks.	Asteraceae	Plantae	1200	3400	0.0277778	5	1	NA	DERM, NERV
114	Artemisia indica Willd.	Asteraceae	Plantae	300	1500	0.194444	5	5	NA	DERM, DGST, HEPT, NERV
115	Artemisia nilagirica (C.B. Clarke) Pamp.	Asteraceae	Plantae	1500	2600	0.111111	5	5	NA	DERM, SPRT
116	Artemisia vulgaris L.	Asteraceae	Plantae	930	1860	0.583333	5	5	NA	CIRC, DERM, FOOD, ORAL, MTRL, RESP, SKEL, SPRT, VETN
117	Artocarpus heterophyllus Lam.	Moraceae	Plantae	300	500	0.194444	2	7	NA	DERM, DGST, FOOD, MTRL, RESP
118	Artocarpus lacucha Buch.-Ham.	Moraceae	Plantae	300	1400	0.305556	2	1	NA	DERM, DGST, FOOD, MTRL
119	Arundina graminifolia (D.Don) Hochr.	Orchidaceae	Plantae	400	2800	0.0555556	5	1	NA	DERM, SKEL
120	Asclepias curassavica L.	Apocynaceae	Plantae	700	1500	0.0277778	2	5	NA	DERM, DGST, HEPT, SPRT
121	Asparagus racemosus Willd.	Asparagaceae	Plantae	500	1900	0.527778	4	5	NA	CIRC, EDCR, HEPT, MENT, SKEL, RESP, URIN, VETN
122	Astilbe rivularis Buch.-Ham. ex D. Don	Saxifragaceae	Plantae	1800	2700	0.666667	5	5	NA	CIRC, DGST, EDCR, ORAL, PREG, SKEL
123	Auricularia auricula-judae (Bull.) J. Schröt.	Auriculariaceae	Fungi	300	3305	0.0555556	5	1	NA	FOOD
124	Azadirachta indica A. Juss.	Meliaceae	Plantae	300	1380	0.222222	4	5	NA	DERM, DGST, EDCR, FOOD, ORAL
125	Baccaurea ramiflora Lour.	Phyllanthaceae	Plantae	300	1000	0.166667	4	3	NA	FOOD
126	Bacopa monnieri (L.) Wettst.	Plantaginaceae	Plantae	300	1400	0.0833333	5	1	LC	CIRC, DGST, EDCR, MENT, RESP, SKEL
127	Bagarius bagarius F. Hamilton	Sisoridae	Animalia	300	700	0.0277778	5	7	NT	FOOD
128	Bambusa balcooa Roxb.	Poaceae	Plantae	300	1400	0.0833333	5	5	NA	FOOD
129	Bambusa nutans Wall. ex Munro	Poaceae	Plantae	300	1600	0.222222	5	1	NA	DERM, FOOD, MTRL, URIN, VETN
130	Bambusa tulda Roxb.	Poaceae	Plantae	800	1500	0.138889	5	1	NA	FOOD
131	Barilius barila F. Hamilton	Cyprinidae	Animalia	300	700	0.0277778	5	7	LC	FOOD
132	Barilius bendelisis bendelisis F. Hamilton	Cyprinidae	Animalia	300	700	0.0277778	5	7	LC	FOOD
133	Barilius shacra F. Hamilton	Cyprinidae	Animalia	300	700	0.0277778	5	7	LC	FOOD
134	Barilius tileo F. Hamilton	Cyprinidae	Animalia	300	700	0.0277778	5	7	LC	FOOD
135	Barilius vagra F. Hamilton	Cyprinidae	Animalia	300	700	0.0277778	5	7	LC	FOOD
136	Basella alba L.	Basellaceae	Plantae	300	1400	0.0555556	4	1	NA	DERM, DGST, SKEL, URIN
137	Bauhinia purpurea L.	Fabaceae	Plantae	300	1500	0.388889	5	5	LC	DGST, EDCR, FOOD, MTRL, URIN
138	Bauhinia scandens L.	Fabaceae	Plantae	300	1500	0.0277778	5	5	NA	ANTI, CIRC, DERM, URIN
139	Bauhinia vahlii Wight & Arn.	Fabaceae	Plantae	300	1500	0.25	5	1	NA	CIRC, DGST, FOOD, VETN
140	Bauhinia variegata L.	Fabaceae	Plantae	300	1800	0.5	5	5	LC	DERM, DGST, FOOD, ORAL, MTRL, SKEL, VETN
141	Begonia cathcartii Hook. f. & Thomson	Begoniaceae	Plantae	900	2900	0.0277778	5	5	NA	CIRC
142	Begonia hatacoa Buch.-Ham. ex D. Don	Begoniaceae	Plantae	1200	1600	0.0277778	5	3	NA	FOOD
143	Begonia longifolia Blume	Begoniaceae	Plantae	300	1500	0.0277778	5	1	NA	DGST, FOOD
144	Begonia nepalensis (A. DC.) Warb.	Begoniaceae	Plantae	1000	1800	0.0277778	5	3	NA	DGST
145	Begonia picta Sm.	Begoniaceae	Plantae	750	1800	0.0833333	5	1	NA	DGST, ORAL, URIN
146	Beilschmiedia sikkimensis King ex Hook. f.	Lauraceae	Plantae	300	1500	0.0833333	5	5	NA	MTRL
147	Benincasa hispida (Thunb.) Cogn.	Cucurbitaceae	Plantae	300	1870	0.0833333	4	1	NA	CIRC, DGST, RESP, URIN
148	Berberis aristata DC.	Berberidaceae	Plantae	1800	3500	0.333333	5	5	NA	ANTI, DGST, EDCR, FOOD, HEPT, OPTH
149	Berberis asiatica Roxb. ex DC.	Berberidaceae	Plantae	1200	2500	0.194444	5	5	NA	EDCR, FOOD, OPTH, SKEL
150	Berberis insignis Hook. f. & Thomson.	Berberidaceae	Plantae	2000	3350	0.0833333	5	1	NA	FOOD
151	Berberis wallichiana DC.	Berberidaceae	Plantae	2000	3300	0.0833333	5	1	NA	ANTI
152	Bergenia ciliata (Haw.) Sternb.	Saxifragaceae	Plantae	900	3200	0.944444	5	6	NA	CIRC, DERM, DGST, FOOD, ORAL, PREG, RESP, SKEL, URIN, VETN
153	Bergenia purpurascens (Hook. f. &Thomson) Engl.	Saxifragaceae	Plantae	3300	4700	0.222222	5	5	NA	DERM, DGST, ORAL, SKEL, URIN
154	Betula alnoides Buch.-Ham. ex D. Don	Betulaceae	Plantae	1500	2600	0.305556	5	5	LC	ANTI, DERM, HEPT, MTRL, SKEL
155	Betula utilis D. Don	Betulaceae	Plantae	2700	4300	0.305556	5	1	LC	DERM, MENT, ORAL, MTRL, SKEL, RESP, URIN, VETN
156	Bidens biternata (Lour.) Merr. & Sherff	Asteraceae	Plantae	1100	2000	0.0833333	5	3	NA	DGST, FOOD, SKEL
157	Bidens pilosa L.	Asteraceae	Plantae	300	2500	0.111111	3	1	NA	CIRC, DERM, HEPT, HEAR, OPTH, SKEL
158	Bischofia javanica Blume	Phyllanthaceae	Plantae	400	1500	0.444444	5	1	NA	DERM, DGST, EDCR, ORAL, MTRL, OPTH, SKEL
159	Bistorta affinis (D. Don) Greene	Polygonaceae	Plantae	3500	4800	0.0555556	5	5	NA	DERM
160	Bistorta vivipara (L.) Delabre	Polygonaceae	Plantae	3200	5000	0.0555556	5	5	NA	DERM, FOOD, ORAL, RESP
161	Bixa orellana L.	Bixaceae	Plantae	300	1000	0.0555556	3	3	NA	ANTI, DERM, HEPT, ORAL
162	Blumea balsamifera (L.) DC.	Asteraceae	Plantae	300	1500	0.0555556	5	1	NA	CIRC, SKEL
163	Blumea densiflora (Wall.) DC.	Asteraceae	Plantae	300	2000	0.0277778	5	1	NA	DGST
164	Blumea fistulosa (Roxb.) Kurz	Asteraceae	Plantae	300	1500	0.0555556	5	1	NA	DGST
165	Blumea lacera (Burm. f.) DC.	Asteraceae	Plantae	300	1300	0.0555556	3	1	NA	DERM, DGST, SKEL, URIN
166	Boehmeria nivea (L.) Gaudich.	Urticaceae	Plantae	300	800	0.0555556	2	3	NA	DERM
167	Boehmeria rugulosa Wedd.	Urticaceae	Plantae	300	1700	0.138889	5	1	NA	DERM, MTRL
168	Boenninghausenia albiflora (Hook.) Rchb. ex Meisn.	Rutaceae	Plantae	1600	3300	0.194444	5	1	NA	DERM, EDCR, ORAL, SKEL, VETN
169	Boerhavia diffusa L.	Nyctaginaceae	Plantae	300	1400	0.111111	3	1	NA	CIRC, HEPT, NERV, OPTH, RESP, URIN
170	Boletus edulis Bull.	Boletaceae	Fungi	300	2500	0.0555556	5	1	NA	FOOD
171	Bombax ceiba L.	Malvaceae	Plantae	300	1500	0.333333	5	5	NA	CIRC, DGST, EDCR, FOOD, NEOP, RESP
172	Borassus flabellifer L.	Arecaceae	Plantae	300	1700	0.0555556	3	5	NA	DGST, URIN
173	Bos grunniens L.	Bovidae	Animalia	4000	6000	0.166667	4	7	NA	FOOD, MTRL, ORAL
174	Bos primigenius indicus L.	Bovidae	Animalia	300	2500	0.333333	1	5	NA	DERM, FOOD, RESP
175	Botrychium ternatum W.H. Wagner	Ophioglossaceae	Plantae	2400	2800	0.0277778	5	7	NA	FOOD
176	Brassaiopsis mitis C.B. Clarke	Araliaceae	Plantae	1800	2500	0.166667	5	1	NA	DGST
177	Brassica rapa L.	Brassicaceae	Plantae	300	4000	0.305556	2	1	NA	DERM, DGST, FOOD, NERV
178	Breonia chinensis (Lam.) Capuron	Rubiaceae	Plantae	300	800	0.0277778	3	7	LC	MTRL
179	Bridelia retusa (L.) A. Juss.	Phyllanthaceae	Plantae	300	1700	0.222222	5	5	NA	DERM, HEPT, MTRL, SKEL
180	Brucea javanica (L.) Merr.	Simaroubaceae	Plantae	1200	2400	0.0555556	5	1	NA	MTRL
181	Brugmansia suaveolens (Humb. & Bonpl. ex Willd.) Bercht. & J. Presl.	Solanaceae	Plantae	400	1800	0.138889	3	1	EX	RESP, SKEL
182	Bryophyllum pinnatum (Lam.) Oken	Crassulaceae	Plantae	300	850	0.0277778	2	7	NA	DGST
183	Bubalus bubalis L.	Bovidae	Animalia	300	3000	0.0833333	1	5	NA	DGST, FOOD, MTRL
184	Buddleja asiatica Lour.	Scrophulariaceae	Plantae	300	2200	0.305556	5	1	NA	DERM, EDCR, HEPT, NERV, PREG
185	Butea monosperma (Lam.) Taub.	Fabaceae	Plantae	300	1200	0.0555556	5	5	NA	EDCR
186	Caesalpinia bonduc (L.) Roxb.	Fabaceae	Plantae	300	1000	0.0277778	5	3	NA	CIRC, EDCR
187	Caesulia axillaris Roxb.	Asteraceae	Plantae	350	1800	0.0277778	5	1	LC	DERM, PREG
188	Cajanus cajan (L.) Millsp.	Fabaceae	Plantae	300	900	0.0555556	5	3	NA	DGST, FOOD, HEPT, ORAL, PREG
189	Calamus acanthospathus Griff.	Arecaceae	Plantae	800	2400	0.0555556	5	2	NA	FOOD
190	Calamus erectus Roxb.	Arecaceae	Plantae	500	1800	0.0277778	5	1	NA	FOOD
191	Calamus flagellum Griff. ex. Mart.	Arecaceae	Plantae	300	1350	0.0833333	5	1	NA	FOOD
192	Calamus latifolius Roxb.	Arecaceae	Plantae	300	1000	0.0277778	5	3	NA	FOOD
193	Calamus rotang L.	Arecaceae	Plantae	300	1200	0.0833333	5	1	NA	EDCR
194	Calanthe sylvatica (Thouars) Lindl.	Orchidaceae	Plantae	800	2000	0.0555556	5	5	NA	ORAL, RESP
195	Calendula officinalis L.	Asteraceae	Plantae	400	1800	0.111111	2	1	NA	DERM, NERV, SKEL
196	Callicarpa arborea Roxb.	Lamiaceae	Plantae	300	1800	0.25	5	1	NA	ANTI, EDCR, FOOD, MTRL, RESP
197	Callicarpa macrophylla Vahl	Lamiaceae	Plantae	300	600	0.0833333	5	7	NA	SKEL, URIN
198	Calotropis gigantea (L.) Dryand.	Apocynaceae	Plantae	300	1200	0.222222	3	5	NA	DERM, DGST, SKEL, RESP
199	Calotropis procera (Aiton) Dryand.	Apocynaceae	Plantae	300	600	0.0833333	3	3	NA	DERM, ORAL, SKEL, RESP
200	Caltha palustris L.	Ranunculaceae	Plantae	2210	4200	0.0277778	5	5	LC	SKEL
201	Camellia sinensis (L.) Kuntze	Theaceae	Plantae	800	2000	0.166667	1	1	NA	DGST, FOOD, URIN
202	Canarium bengalense Roxb.	Burseraceae	Plantae	300	500	0.0555556	5	3	NA	FOOD
203	Canarium sikkimense King	Burseraceae	Plantae	300	1000	0.0277778	5	3	NA	DERM
204	Canarium strictum Roxb.	Burseraceae	Plantae	300	960	0.0555556	5	3	NA	DERM, SKEL, URIN
205	Canis lupus familiaris L.	Canidae	Animalia	300	3000	0.0277778	1	5	NA	DERM, CULT
206	Canna indica L.	Canaceae	Plantae	300	1800	0.111111	5	5	NA	CIRC, FOOD, URIN
207	Cannabis sativa L.	Cannabaceae	Plantae	300	2400	0.333333	5	5	NA	CIRC, DGST, EDCR, SKEL, VETN
208	Cantharellus cibarius Fr.	Cantharellaceae	Fungi	300	2500	0.0555556	5	1	NA	FOOD
209	Capra aegagrus hircus L.	Bovidae	Animalia	300	3000	0.0277778	1	5	NA	DERM, FOOD, MTRL
210	Capsella bursa-pastoris (L.) Medik.	Brassicaceae	Plantae	1800	4500	0.0833333	3	1	NA	CIRC, DGST, NERV, VETN
211	Capsicum annuum L.	Solanaceae	Plantae	300	3000	0.138889	2	1	NA	DGST, FOOD, SKEL, VETN
212	Carapichea ipecacuanha (Brot.) L. Andersson	Rubiaceae	Plantae	800	1300	0.0555556	2	1	NA	DGST, HEPT
213	Cardamine flexuosa With.	Brassicaceae	Plantae	300	3200	0.0277778	3	1	NA	FOOD
214	Cardamine griffithii Hook. f. & Thomson	Brassicaceae	Plantae	3000	4000	0.0277778	5	3	NA	FOOD
215	Cardamine hirsuta L.	Brassicaceae	Plantae	700	2500	0.111111	3	1	NA	CIRC, HEPT, URIN
216	Cardamine macrophylla Willd.	Brassicaceae	Plantae	2100	4100	0.0555556	5	1	NA	CIRC, HEPT, URIN
217	Carex filicina Nees	Cyperaceae	Plantae	1200	4000	0.0277778	5	1	LC	FOOD
218	Carica papaya L.	Caricaceae	Plantae	300	1500	0.305556	1	1	NA	ANTI, DGST, FOOD, PREG
219	Caryota urens L.	Arecaceae	Plantae	300	1700	0.138889	5	1	LC	DGST, EDCR, FOOD, URIN
220	Casearia glomerata Roxb.	Salicaceae	Plantae	600	1800	0.0555556	5	1	NA	FOOD
221	Cassia fistula L.	Fabaceae	Plantae	900	1200	0.25	5	5	NA	DERM, EDCR, FOOD, RESP, SKEL, URIN
222	Cassiope fastigiata (Wall.) D. Don	Ericaceae	Plantae	3000	5000	0.0833333	3	5	NA	DERM, MTRL, SPRT
223	Castanopsis hystrix Hook. f. & Thomson ex A. DC.	Fagaceae	Plantae	1800	2500	0.111111	5	5	NA	FOOD, MTRL
224	Castanopsis indica (Roxb. ex. Lindl.) A. DC.	Fagaceae	Plantae	750	1500	0.166667	5	5	NA	DFST, EDCR, FOOD MTRL, NEOP, URIN
225	Castanopsis purpurella (Mig) N.P. Balakr.	Fagaceae	Plantae	900	2500	0.0555556	5	5	NA	FOOD, MTRL
226	Castanopsis tribuloides (Sm.) A. DC.	Fagaceae	Plantae	1200	2400	0.194444	5	5	NA	ANTI, FOOD, MTRL
227	Catharanthus roseus (L.) G. Don	Apocynaceae	Plantae	300	2000	0.194444	3	5	NA	EDCR, FOOD, HEPT
228	Catunaregam spinosa (Thunb.) Tirveng.	Rubiaceae	Plantae	1200	1900	0.0555556	5	3	NA	DGST
229	Caulokaempferia sikkimensis (King ex Baker) K. Larsen	Zingiberaceae	Plantae	1320	1800	0.138889	5	7	NA	DERM
230	Cautleya gracilis (Sm.) Dandy	Zingiberaceae	Plantae	1500	2500	0.0555556	5	5	NA	DERM, DGST
231	Cautleya spicata (Sm.) Baker	Zingiberaceae	Plantae	1100	1600	0.0277778	5	7	NA	DERM, DGST
232	Cayratia pedata (Lam.) Gagnep.	Vitaceae	Plantae	800	2200	0.0277778	5	6	VU	FOOD
233	Cayratia trifolia (L.) Domin	Vitaceae	Plantae	500	1000	0.0277778	5	3	NA	FOOD, MTRL
234	Cedrus deodara (Roxb. ex D. Don) G. Don	Pinaceae	Plantae	1800	3000	0.0277778	2	1	LC	VETN
235	Celastrus paniculatus Willd.	Celastraceae	Plantae	350	1200	0.305556	5	1	NA	DERM, NERV, SKEL, VETN
236	Celosia argentea L.	Amaranthaceae	Plantae	500	1600	0.138889	2	1	NA	DERM, FOOD, URIN
237	Celtis tetrandra Roxb.	Cannabaceae	Plantae	1500	3000	0.0833333	5	1	NA	MTRL, SKEL, RESP
238	Centella asiatica (L.) Urb	Apiaceae	Plantae	300	2000	0.5	5	5	LC	DERM, EDCR, HEPT, MENT, RESP, URIN, VETN
239	Cephalanthera longifolia (L.) Fritsch.	Orchidaceae	Plantae	1000	3600	0.0555556	5	5	NA	EDCR
240	Cephalostachyum capitatum Munro	Poaceae	Plantae	1200	1800	0.0555556	5	3	NA	FOOD, MTRL
241	Chaetoseris cyanea (D. Don) C. Shih	Asteraceae	Plantae	2100	4300	0.0277778	5	1	NA	DERM
242	Chaimarrornis leucocephalus Vigors	Muscicapidae	Animalia	1800	4800	0.0277778	5	1	LC	CULT
243	Channa gachua F. Hamilton	Channidae	Animalia	300	400	0.0277778	5	7	LC	FOOD
244	Channa orientalis Bloch & J. G. Schneider	Channidae	Animalia	300	380	0.0277778	5	7	NA	FOOD
245	Channa punctatus Bloch	Channidae	Animalia	300	400	0.0277778	5	7	NA	FOOD
246	Chassalia curviflora (Wall.) Thwaites	Rubiaceae	Plantae	500	2000	0.0277778	5	1	NA	FOOD
247	Cheilocostus speciosus (J. Koenig) C.D. Specht	Costaceae	Plantae	400	1500	0.666667	5	5	NA	DERM, DGST, EDCR, URIN, VETN
248	Chenopodium album L.	Amaranthaceae	Plantae	1800	2200	0.305556	1	5	NA	CIRC, DGST, FOOD, PREG, URIN
249	Choerospondias axillaris (Roxb.) B. L. Burtt & A. W. Hill	Anacardiaceae	Plantae	300	1500	0.305556	4	1	NA	FOOD
250	Chromolaena odorata (L.) R. M. King & H. Rob.	Asteraceae	Plantae	400	1500	0.0555556	3	1	NA	DERM
251	Chrysanthemum indicum L.	Asteraceae	Plantae	300	2900	0.0833333	4	1	NA	NERV, URIN
252	Chrysopogon gryllus (L.) Trin.	Poaceae	Plantae	800	2900	0.0277778	5	1	NA	DGST
253	Chrysopogon zizanioides (L.) Roberty	Poaceae	Plantae	300	1000	0.0277778	5	3	NA	DGST
254	Chukrasia tabularis A. Juss.	Meliaceae	Plantae	350	1200	0.0555556	5	1	LC	DERM, DGST, SKEL
255	Cinchona officinalis L.	Rubiaceae	Plantae	1500	3000	0.111111	1	1	NA	CIRC, EDCR, HEPT
256	Cinnamomum bejolghota (Buch.-Ham.) Sweet	Lauraceae	Plantae	400	2000	0.0277778	5	1	NA	DERM
257	Cinnamomum camphora (L.) J. Presl.	Lauraceae	Plantae	350	1500	0.111111	2	1	NA	DERM, RESP, SKEL
258	Cinnamomum impressinervium Meisn.	Lauraceae	Plantae	1220	2500	0.111111	5	1	NA	DGST, FOOD, SKEL, URIN
259	Cinnamomum tamala (Buch.-Ham.) T. Nees. & Eberm.	Lauraceae	Plantae	400	1900	0.472222	4	1	NA	ANTI, DERM, DGST, EDCR, FOOD, SKEL, URIN
260	Circaea alpina L.	Onagraceae	Plantae	2400	3400	0.0277778	5	1	NA	DERM
261	Cirsium wallichii DC.	Asteraceae	Plantae	1600	2700	0.0555556	5	1	NA	DGST, RESP
262	Cissampelos pareira L.	Menispermaceae	Plantae	300	2300	0.305556	5	5	NA	ANTI, DERM, DGST, EDCR, HEPT, ORAL, URIN, VETN
263	Cissus adnata Roxb.	Vitaceae	Plantae	500	1100	0.0277778	3	1	NA	FOOD
264	Cissus elongata Roxb.	Vitaceae	Plantae	300	1300	0.0277778	5	1	NA	FOOD
265	Cissus repanda (Wight & Arn.) Vahl	Vitaceae	Plantae	400	1000	0.0277778	5	3	NA	FOOD
266	Cissus repens Lam.	Vitaceae	Plantae	300	1200	0.0277778	3	1	NA	FOOD
267	Citrullus colocynthis (L.) Schrad.	Cucurbitaceae	Plantae	1500	2000	0.166667	3	7	NA	FOOD
268	Citrus aurantifolia (Christm.) Swingle	Rutaceae	Plantae	300	2400	0.166667	1	5	NA	DGST, FOOD, HEPT, RESP
269	Citrus indica Yu. Tanaka	Rutaceae	Plantae	500	1190	0.222222	5	1	NA	DGST, HEPT, RESP
270	Citrus maxima (Burm.) Merr.	Rutaceae	Plantae	300	500	0.111111	1	1	NA	HEPT, RESP
271	Citrus medica L.	Rutaceae	Plantae	700	1200	0.25	1	1	NA	ANTI, DERM, DGST, HEPT, SPRT, URIN
272	Citrus reticulata Blanco	Rutaceae	Plantae	300	1600	0.361111	1	1	NA	DGST, FOOD, HEPT, RESP
273	Cladonia mitis Sandst.	Cladoniaceae	Fungi	2000	4000	0.0555556	5	5	NA	HEPT, RESP
274	Cladonia rangiferina (L.) Weber ex F. H. Wigg.	Cladoniaceae	Fungi	3400	4500	0.0555556	5	5	NA	RESP
275	Clausena dentata (Willd.) Roem.	Rutaceae	Plantae	800	2100	0.0277778	5	1	NA	FOOD
276	Clematis acuminata DC.	Ranunculaceae	Plantae	500	2400	0.0555556	5	5	NA	RESP
277	Clematis buchananiana DC.	Ranunculaceae	Plantae	1000	3000	0.583333	5	5	NA	DERM, DGST, NERV, RESP, SKEL, VETN
278	Clematis montana Buch.-Ham. ex DC.	Ranunculaceae	Plantae	1600	4000	0.0833333	5	5	NA	MTRL, RESP, VETN
279	Clematis smilacifolia Wall.	Ranunculaceae	Plantae	900	2500	0.0277778	5	5	NA	RESP, VETN
280	Clematis wightiana Wall.	Ranunculaceae	Plantae	800	2200	0.0555556	5	5	NA	RESP, VETN
281	Cleome gynandra L.	Cleomaceae	Plantae	300	1800	0.0277778	2	1	NA	DERM, SKEL
282	Cleome viscosa L.	Cleomaceae	Plantae	300	1000	0.0277778	3	3	NA	DERM, DGST, PREG, VETN
283	Clerodendrum chinese (Osbeck) Mabb.	Lamiaceae	Plantae	300	1700	0.0277778	3	1	NA	CIRC, DGST, EDCR, ORAL
284	Clerodendrum indicum (L.) Kuntze	Lamiaceae	Plantae	300	1700	0.0833333	5	5	NA	CIRC
285	Clerodendrum infortunatum L.	Lamiaceae	Plantae	300	1500	0.138889	5	1	NA	CIRC
286	Clitoria ternatea L.	Fabaceae	Plantae	300	900	0.0277778	5	3	NA	OPTH
287	Clupisoma garua F. Hamilton	Schilbeidae	Animalia	300	600	0.0277778	5	7	LC	FOOD
288	Clupisoma montana Hora	Schilbeidae	Animalia	300	600	0.0277778	5	7	LC	FOOD
289	Coccinia grandis (L.) Voigt.	Cucurbitaceae	Plantae	300	1550	0.111111	5	5	NA	EDCR, HEPT, URIN
290	Cocos nucifera L.	Arecaceae	Plantae	300	800	0.111111	1	3	NA	CIRC, DGST, FOOD, MTRL
291	Codonopsis foetens Hook. f. & Thomson	Campanulaceae	Plantae	3900	5300	0.0555556	5	3	NA	DGST, NERV, PREG, RESP
292	Codonopsis inflata Hook. f.	Campanulaceae	Plantae	1800	2700	0.0277778	5	1	NA	DGST, RESP
293	Codonopsis viridis Wall.	Campanulaceae	Plantae	1200	2700	0.0277778	5	1	NA	DGST
294	Coelogyne cristata Lindl.	Orchidaceae	Plantae	1200	2400	0.111111	5	5	NA	DERM, NERV
295	Coelogyne fuscescens Lindl.	Orchidaceae	Plantae	700	2000	0.166667	5	5	NA	DGST
296	Coelogyne punctulata Lindl.	Orchidaceae	Plantae	1221	2200	0.0555556	5	5	NA	DERM, DGST, NERV
297	Coffea arabica L.	Rubiaceae	Plantae	300	1000	0.0555556	2	3	NA	DGST, EDCR
298	Coix lacryma-jobi L.	Poaceae	Plantae	400	2100	0.0833333	1	5	NA	DGST, URIN
299	Colebrookea oppositifolia Sm.	Lamiaceae	Plantae	300	1700	0.194444	5	5	NA	DERM, SKEL, RESP, VETN
300	Colocasia antiquorum Schott	Araceae	Plantae	300	1500	0.194444	1	5	NA	DERM, FOOD, RESP
301	Commelina benghalensis L.	Commelinaceae	Plantae	900	1800	0.166667	5	1	LC	DERM
302	Coprinus comatus (O. F. Müll.) Pers.	Agaricaceae	Fungi	300	2850	0.0277778	5	1	NA	FOOD
303	Cordia dichotoma G. Forst.	Boraginaceae	Plantae	300	1400	0.0555556	5	1	NA	DERM, RESP
304	Coriandrum sativum L.	Apiaceae	Plantae	300	1800	0.25	1	1	NA	DGST, FOOD, RESP
305	Coriaria nepalensis Wall.	Coriariaceae	Plantae	300	3200	0.0277778	5	1	NA	SKEL
306	Cornus capitata Wall.	Cornaceae	Plantae	1700	3400	0.0277778	5	1	NA	FOOD
307	Corvus splendens Viel.	Corvidae	Animalia	300	2700	0.0277778	5	5	LC	DGST
308	Corydalis chaerophylla DC.	Papaveraceae	Plantae	2100	4000	0.0277778	5	1	NA	DGST
309	Corydalis govaniana Wall.	Papaveraceae	Plantae	2400	4800	0.0277778	5	1	NA	DGST
310	Corylus ferox Wall.	Betulaceae	Plantae	2000	3000	0.0277778	5	1	NA	FOOD
311	Corymborkis veratrifolia (Reinw.) Blume	Orchidaceae	Plantae	700	1000	0.0555556	5	7	NA	DGST
312	Cotoneaster microphyllus Wall. ex. Lindl.	Rosaceae	Plantae	1620	3000	0.0277778	5	1	NA	DERM
313	Crassocephalum crepidioides (Benth.) S. Moore	Asteraceae	Plantae	400	1900	0.0555556	3	1	NA	DERM, DGST, EDCR
314	Crateva religiosa G. Forst.	Capparaceae	Plantae	300	1000	0.0833333	3	3	NA	FOOD, SKEL
315	Crateva unilocularis Buch.-Ham.	Capparaceae	Plantae	300	1500	0.0277778	5	1	NA	FOOD, RESP, SKEL
316	Cremastra appendiculata (D.Don) Makino	Orchidaceae	Plantae	400	2900	0.0555556	5	5	NA	ANTI, ORAL
317	Crepidium acuminatum (D.Don) Szlach.	Orchidaceae	Plantae	300	2100	0.0555556	5	5	NA	CIRC, RESP
318	Crossocheilus latius F. Hamilton	Schilbeidae	Animalia	300	360	0.0277778	5	7	LC	FOOD
319	Croton caudatus Geiseler	Euphorbiaceae	Plantae	300	1500	0.0555556	5	1	NA	PREG
320	Cryptomeria japonica (Thunb. ex. L.f.) D. Don	Cupressaceae	Plantae	1221	2600	0.0277778	3	5	NT	MTRL
321	Cuculus micropterus Gould.	Cuculidae	Animalia	600	1700	0.0277778	5	1	LC	CULT
322	Cuculus saturatus Blyth	Cuculidae	Animalia	1200	2700	0.0277778	5	1	LC	CULT
323	Cucurbita pepo L.	Cucurbitaceae	Plantae	300	1800	0.194444	1	1	NA	DERM, DGST, FOOD, PREG
324	Curculigo orchioides Gaertn.	Hypoxidaceae	Plantae	300	1500	0.111111	5	5	NA	DGST, HEPT, URIN
325	Curcuma amada Roxb.	Zingiberaceae	Plantae	400	1600	0.0833333	4	5	NA	DERM, RESP
326	Curcuma angustifolia Roxb.	Zingiberaceae	Plantae	300	1500	0.0833333	4	5	NA	EDCR, RESP
327	Curcuma aromatica Salisb.	Zingiberaceae	Plantae	300	1600	0.0833333	4	5	NA	CIRC, DGST, NERV
328	Curcuma caesia Roxb.	Zingiberaceae	Plantae	400	1600	0.194444	4	5	NA	DGST, NEOP
329	Curcuma longa L.	Zingiberaceae	Plantae	300	1700	0.305556	1	5	NA	DERM, FOOD, SKEL, RESP, VETN
330	Curcuma zedoaria (Christm.) Roscoe	Zingiberaceae	Plantae	400	900	0.194444	4	7	NA	DERM, EDCR, RESP
331	Cuscuta reflexa Roxb.	Convolvulaceae	Plantae	300	2200	0.361111	3	5	NA	DGST, EDCR, HEPT, SKEL, URIN
332	Cyanthillium cinereum (L.) H. Rob.	Asteraceae	Plantae	300	2300	0.0277778	3	1	NA	RESP
333	Cyathea spinulosa Wall. ex Hook.	Cyatheaceae	Plantae	1200	2000	0.138889	5	1	NA	DERM, FOOD, SKEL
334	Cyathula prostrata (L.) Blume	Amaranthaceae	Plantae	900	1100	0.0555556	5	5	NA	SKEL
335	Cycas pectinata Buch.-Ham.	Cycadaceae	Plantae	300	1500	0.0555556	5	6	VU	DGST, FOOD
336	Cydonia oblonga Mill.	Rosaceae	Plantae	500	1500	0.0277778	2	1	NA	CIRC, NERV
337	Cymbidium eburneum Lindl.	Orchidaceae	Plantae	800	2000	0.0555556	5	5	NA	DERM, NEOP, NERV
338	Cymbidium grandiflorum Sw.	Orchidaceae	Plantae	1500	2100	0.0277778	5	8	NA	FOOD
339	Cynodon dactylon (L.) Pers.	Poaceae	Plantae	300	2000	0.305556	3	5	NA	DERM, DGST, EDCR, MENT, NERV, OPTH, URIN
340	Cynoglossum zeylanicum (Vahl) Brand	Boraginaceae	Plantae	1200	3660	0.0277778	5	5	NA	DGST
341	Dacryopinax spathularia (Schwein) G.W. Martin	Dacrymycetaceae	Fungi	1800	2500	0.0277778	5	1	NA	FOOD
342	Dactylcapnos macrocapnos (Prain) Hutch.	Papaveraceae	Plantae	1221	3000	0.0277778	5	1	NA	NERV
343	Dactylicapnos scandens (D. Don) Hutch.	Papaveraceae	Plantae	1600	2500	0.0277778	5	1	NA	NERV
344	Dactylorhiza hatagirea (D.Don) Soo.	Orchidaceae	Plantae	2210	3660	0.305556	5	5	NA	CIRC, DGST, FOOD, HEPT, SKEL, RESP
345	Dactylorhiza incarnata (L.) Soo	Orchidaceae	Plantae	1400	2800	0.166667	5	5	NA	DGST, HEPT, SKEL
346	Dalbergia latifolia Roxb.	Fabaceae	Plantae	300	600	0.0555556	5	4	VU	DGST, EDCR, MTRL, PREG
347	Dalbergia sissoo DC.	Fabaceae	Plantae	300	750	0.111111	5	7	NA	CIRC, DERM, DGST, ORAL, MTRL, OPTH, URIN
348	Daphne bholua Buch.-Ham. ex D. Don	Thymelaeaceae	Plantae	1800	3000	0.138889	4	5	NA	ANTI, DGST, EDCR, MTRL, RESP, URIN
349	Daphne papyracea Wall. Ex Steud	Thymelaeaceae	Plantae	1700	3400	0.222222	4	5	NA	ANTI, MTRL
350	Dasiphora fruticosa (L.) Rydb.	Rosaceae	Plantae	2500	3965	0.0555556	5	5	NA	CIRC
351	Datura innoxia Mill.	Solanaceae	Plantae	300	600	0.0277778	2	7	NA	ANTI, ORAL
352	Datura metel L.	Solanaceae	Plantae	1200	2100	0.361111	3	1	NA	ANTI, ORAL, NERV, SKEL, VETN
353	Datura stramonium L.	Solanaceae	Plantae	300	2200	0.0555556	3	5	NA	ORAL, NERV
354	Debregeasia longifolia (Burm. f.) Wedd.	Urticaceae	Plantae	1221	2300	0.0555556	5	1	NA	FOOD
355	Debregeasia wallichiana (Wedd.) Wedd.	Urticaceae	Plantae	1000	2000	0.0555556	5	3	NA	FOOD
356	Decaisnea insignis Hook f. & Thomson	Lardizabalaceae	Plantae	1000	2000	0.0277778	5	3	NA	FOOD
357	Delima scandens (L.) Burkill	Dilleniaceae	Plantae	300	800	0.0277778	5	7	NA	DERM
358	Delphinium denudatum Wall ex. Hook f. & Thomson	Ranunculaceae	Plantae	1500	2700	0.0277778	5	1	NA	MTRL
359	Dendrobium densiflorum Lindl.	Orchidaceae	Plantae	300	2100	0.111111	5	5	NA	SKEL
360	Dendrobium denudans D.Don	Orchidaceae	Plantae	-	-	0.0555556	5	5	NA	ORAL, RESP
361	Dendrobium jenkinsii Wall. ex. Lindl.	Orchidaceae	Plantae	700	1300	0.0555556	5	5	NA	CIRC, DGST, OPTH
362	Dendrobium macraei Lindl.	Orchidaceae	Plantae	-	-	0.0555556	5	5	NA	EDCR
363	Dendrobium moschatum (Buch.-Ham) Sw.	Orchidaceae	Plantae	500	1300	0.0555556	5	5	NA	HEAR, SKEL
364	Dendrobium nobile Lindl.	Orchidaceae	Plantae	300	2200	0.138889	5	6	NA	DERM, RESP
365	Dendrocalamus hamiltonii Nees & Arn. ex Murro	Poaceae	Plantae	700	1800	0.305556	5	1	NA	FOOD, MTRL
366	Dendrocalamus hookeri Munro	Poaceae	Plantae	600	1750	0.0833333	5	1	NA	EDCR, FOOD, MTRL
367	Dendrocalamus sikkimensis Gamble ex Oliv.	Poaceae	Plantae	1000	1800	0.194444	5	7	NA	FOOD, MTRL
368	Dendrocalamus strictus (Roxb.) Nees	Poaceae	Plantae	900	1800	0.0555556	5	1	NA	MTRL
369	Dendrocnide sinuata (Blume) Chew	Urticaceae	Plantae	300	1500	0.0555556	5	5	NA	ANTI, DGST, NERV, RESP
370	Dendrophthoe falcata (L.f.) Ettingsh.	Loranthaceae	Plantae	750	1500	0.0555556	5	5	NA	DERM, EDCR, SKEL
371	Deparia boryana (Willd.) M. Kato	Athyriaceae	Plantae	600	2700	0.0277778	5	1	NA	FOOD
372	Desmodium elegans DC.	Fabaceae	Plantae	1000	3000	0.0555556	5	5	LC	DGST, OPTH, RESP, URIN
373	Desmodium oojeinense (Roxb.) H. Ohashi	Fabaceae	Plantae	300	1500	0.0555556	5	1	NA	DGST, OPTH
374	Desmostachya bipinnata (L.) Stapf.	Poaceae	Plantae	300	1750	0.0555556	5	5	LC	ORAL, PREG, URIN
375	Dicentra scandens (D. Don) Walp.	Balsaminaceae	Plantae	1700	2900	0.111111	5	5	NA	DERM, DGST, EDCR
376	Dichroa febrifuga Lour.	Hydrangeaceae	Plantae	900	2400	0.583333	5	5	NA	CIRC, EDCR, HEPT, SKEL
377	Dichrocephala integrifolia (L.f.) Kuntz.	Asteraceae	Plantae	300	2700	0.0833333	5	1	NA	DERM
378	Dicrurus paradiseus L.	Dicruridae	Animalia	-	-	0.0555556	5	1	LC	CULT
379	Didymocarpus pedicellata R. Br	Gesneriaceae	Plantae	1200	1800	0.111111	5	3	NA	CIRC, DERM, NERV, SPRT, URIN
380	Digitalis purpurea L.	Plantaginaceae	Plantae	800	3450	0.25	2	1	NA	NERV, RESP
381	Digitaria sanguinalis (L.) Scop.	Poaceae	Plantae	-	-	0.0277778	3	1	NA	MTRL
382	Dillenia indica L.	Dilleniaceae	Plantae	300	1200	0.222222	5	1	NA	FOOD, RESP
383	Dioscorea alata L.	Dioscoreaceae	Plantae	300	1800	0.222222	1	5	NA	DERM, DGST, FOOD, URIN
384	Dioscorea belophylla (Prain) Viogt ex Haines	Dioscoreaceae	Plantae	300	1000	0.138889	5	7	NA	DERM, FOOD
385	Dioscorea bulbifera L.	Dioscoreaceae	Plantae	300	1500	0.472222	5	5	NA	CIRC, DGST, FOOD, PREG, RESP
386	Dioscorea deltoidea Wall. ex Griseb.	Dioscoreaceae	Plantae	700	2200	0.305556	5	6	NA	FOOD, SKEL, RESP, VETN
387	Dioscorea hamiltonii Hook. f.	Dioscoreaceae	Plantae	1200	1700	0.166667	5	7	NA	DERM, FOOD
388	Dioscorea pentaphylla L.	Dioscoreaceae	Plantae	300	1800	0.305556	5	5	NA	CIRC, DERM, EDCR, FOOD, PREG, SKEL
389	Dioscorea sikkimensis Prain & Burkill	Dioscoreaceae	Plantae	500	1300	0.0555556	5	5	NA	FOOD
390	Diplazium esculentum (Retz.) Sw.	Athyriaceae	Plantae	400	1600	0.138889	4	1	NA	DGST, FOOD
391	Diploknema butyracea (Roxb.) H. J. Lam	Sapotaceae	Plantae	600	1775	0.611111	4	1	NA	DERM, FOOD, MTRL, SKEL, RESP
392	Dipteris wallichii (R. Br.) T. Moore	Dipteridaceae	Plantae	1000	1700	0.0833333	5	3	NA	DERM
393	Dittelasma rarak (DC.) Hiern	Sapindaceae	Plantae	500	1700	0.0277778	5	1	NA	FOOD
394	Docynia indica (Wall.) Decne.	Rosaceae	Plantae	1221	2440	0.0833333	5	1	NA	DGST
395	Drepanostachyum intermedium (Munro) Keng f.	Poaceae	Plantae	2600	3600	0.0277778	5	1	NA	MTRL
396	Drymaria cordata (L.) Willd. ex Schult.	Caryophyllaceae	Plantae	300	2000	0.638889	5	1	NA	ANTI, DGST, EDCR, NERV, OPTH, RESP, VETN
397	Drymaria villosa Schltdl. & Cham.	Caryophyllaceae	Plantae	1000	3100	0.0555556	5	1	NA	DERM, SKEL, RESP
398	Dryopteris cochleata (D. Don) C. Chr.	Dryopteridaceae	Plantae	800	1300	0.0555556	5	1	NA	FOOD
399	Duabanga grandiflora (DC.) Walp.	Lythraceae	Plantae	300	1500	0.0555556	5	1	NA	DERM, DGST, MTRL
400	Duchesnea indica (Jacks.) Focke	Rosaceae	Plantae	1000	2500	0.0277778	5	1	NA	CIRC, DGST
401	Duranta erecta L.	Verbenaceae	Plantae	300	1600	0.0277778	2	1	NA	MTRL
402	Dysoxylum mollissimum Blume	Meliaceae	Plantae	300	600	0.0277778	2	3	NA	DGST
403	Dysphania ambrosioides (L.) Mosyakin & Clemants	Amaranthaceae	Plantae	300	2600	0.0555556	3	5	NA	DGST
404	Eclipta prostrata (L.) L.	Asteraceae	Plantae	300	1600	0.111111	3	5	NA	DERM, DGST, ORAL, HEAR
405	Edgeworthia gardneri (Wall.) Meism.	Thymelaeaceae	Plantae	1500	3000	0.111111	5	1	NA	DGST, MTRL
406	Elaegnus latifolia L.	Elaeagnaceae	Plantae	700	2300	0.166667	5	1	NA	FOOD
407	Elaegnus rhamnoides (L.) A. Nelson	Elaeagnaceae	Plantae	2100	3600	0.0277778	5	1	NA	CIRC, DERM
408	Elaeocarpus lanceaefolius Roxb.	Elaeocarpaceae	Plantae	1500	2200	0.166667	5	5	NA	FOOD, MTRL, NERV
409	Elaeocarpus serratus L.	Elaeocarpaceae	Plantae	300	1700	0.111111	5	1	NA	NERV
410	Elaeocarpus sikkimensis Mast.	Elaeocarpaceae	Plantae	1500	2000	0.0833333	5	3	NA	CIRC, FOOD, HEPT
411	Elatostema platyphyllum Wedd.	Urticaceae	Plantae	700	1900	0.0555556	5	1	NA	DGST, FOOD
412	Elatostema sessile J. R. Forst.	Uritcaceae	Plantae	900	2500	0.138889	5	1	NA	DGST, FOOD, VETN
413	Elephantopus scaber L.	Asteraceae	Plantae	300	1500	0.0833333	5	5	NA	DGST, MTRL, PREG
414	Eleusine coracana (L.) Gaertn.	Poaceae	Plantae	1100	2000	0.25	1	3	NA	DERM
415	Elsholtzia balanda (Benth.) Benth.	Lamiaceae	Plantae	300	2000	0.166667	5	1	NA	DGST, NERV, URIN, VETN
416	Embelia frondosa (King ex Gamble) D. G. Long	Primulaceae	Plantae	2700	2900	0.0277778	5	3	NA	ORAL
417	Embelia ribes Burm. f.	Primulaceae	Plantae	300	2000	0.0833333	5	1	NA	VETN
418	Emilia sonchifolia (L.) DC. ex DC.	Asteraceae	Plantae	350	1700	0.0555556	3	1	NA	DGST, FOOD
419	Engelhardia spicata Lerch ex. Blume	Juglandaceae	Plantae	1500	2500	0.166667	5	1	NA	DGST, ORAL, MTRL, SKEL
420	Enkianthus deflexus (Griff.) C. K. Schneid.	Ericaceae	Plantae	2221	3600	0.0277778	5	1	NA	DERM, MTRL
421	Entada gigas (L.) Fawc. & Rendle	Fabaceae	Plantae	300	1400	0.111111	3	1	NA	DERM, DGST, FOOD
422	Entada rheedii Spreng.	Fabaceae	Plantae	700	1600	0.305556	3	1	NA	DERM, EDCR, FOOD
423	Entoloma lividoalbum (Kuhner & Romagn.) Kubicka	Entolomataceae	Fungi	1800	2500	0.0555556	5	1	NA	FOOD
424	Ephedra gerardiana Wal.l ex Stapf.	Ephedraceae	Plantae	2400	5000	0.305556	5	1	NA	CIRC, DERM, SKEL, RESP
425	Equisetum diffusum D. Don	Equisetaceae	Plantae	700	2000	0.222222	5	5	NA	DERM, DGST, FOOD, ORAL
426	Equisetum ramosissium Desf.	Equisetaceae	Plantae	300	3200	0.0555556	5	1	NA	DERM, DGST, FOOD, ORAL
427	Eragrostis amabilis (L.) Wight & Arn.	Poaceae	Plantae	300	1000	0.0277778	5	3	NA	ANTI
428	Eriobotrya dubia (Lindley) Decaisne	Rosaceae	Plantae			0.0555556	5	1	NA	RESP
429	Eriolobus indica Schn.	Rosaceae	Plantae	1200	1800	0.166667	5	3	NA	FOOD, MTRL
430	Eryngium foetidum L.	Apiaceae	Plantae	300	1700	0.111111	1	1	NA	DERM, EDCR, FOOD, URIN
431	Erythrina arborescens Roxb.	Fabaceae	Plantae	1500	2400	0.138889	5	5	NA	DERM, MTRL, SKEL, VETN
432	Erythrina stricta Roxb.	Fabaceae	Plantae	300	1600	0.0833333	5	5	NA	VETN
433	Erythrina variegata L.	Fabaceae	Plantae	300	1500	0.0555556	5	5	LC	VETN
434	Eucalyptus eudesmioides F. Muell	Myrtaceae	Plantae	300	1700	0.0833333	3	1	NA	DERM, RESP
435	Eugenia bracteata (Willd.) Roxb.	Myrtaceae	Plantae	500	900	0.0277778	5	3	NA	FOOD
436	Eulophia dabia (D. Don) Hochr.	Orchidaceae	Plantae	1500	2400	0.0555556	5	5	NA	PREG
437	Eulophia spectabilis (Dennst.) Suresh	Orchidaceae	Plantae	660	900	0.166667	5	7	NA	PREG
438	Eupatorium cannabinum L.	Asteraceae	Plantae	300	2500	0.611111	3	5	NA	DERM, DGST, URIN
439	Eupatorium capillifolium (Lam.) Small ex Porter & Britton	Asteraceae	Plantae	300	2000	0.138889	3	5	NA	DERM, DGST, RESP, URIN
440	Euphorbia hirta L.	Euphorbiaceae	Plantae	300	1800	0.222222	5	1	NA	DGST, EDCR, FOOD, OPTH, PREG, RESP, SKEL, URIN
441	Euphorbia luteoviridis D.G. Long	Euphorbiaceae	Plantae	2000	4000	0.0555556	5	1	NA	DERM
442	Euphorbia pulcherrima Willd. ex Klotzsch	Euphorbiaceae	Plantae	300	1700	0.138889	2	1	NA	DERM, ORAL, PREG
443	Euphorbia royleana Boiss.	Euphorbiaceae	Plantae	300	2300	0.138889	3	1	NA	DERM, HEAR, RESP
444	Eurya acuminata DC.	Pentaphylacaceae	Plantae	700	3000	0.0555556	5	1	NA	ANTI, FOOD, SKEL
445	Eurya japonica Thunb.	Pentaphylacaceae	Plantae	1300	3500	0.0833333	5	5	NA	DERM, MTRL, SKEL
446	Eurya nitida Korth.	Pentaphylacaceae	Plantae	800	2500	0.0277778	5	1	NA	MTRL, SKEL
447	Everniastrum nepalense (Taylor) Hale ex Sipman.	Parmeliaceae	Fungi	1410	3600	0.0555556	5	5	NA	RESP
448	Evodia fraxinifolia (Hook.) Benth.	Rutaceae	Plantae	1200	2450	0.555556	5	1	NA	DGST, FOOD, HEPT, NERV
449	Evodia trichotoma (Lour.) Pierre	Rutaceae	Plantae	1000	2000	0.0277778	5	3	NA	DGST, SKEL, RESP
450	Evolvulus nummularius (L.) L.	Convolvulaceae	Plantae	300	910	0.0277778	3	3	NA	ORAL
451	Fagopyrum acutatum (Lehm.) Mansf. Ex K. Hammer	Polygonaceae	Plantae	1500	2500	0.194444	1	1	NA	DGST
452	Fagopyrum esculantum (Lehm.) Mansf. ex K. Hammer	Polygonaceae	Plantae	1500	3000	0.444444	1	1	NA	DGST, FOOD, RESP, SPRT, VETN
453	Fagopyrum tataricum (L.) Gaertn.	Polygonaceae	Plantae	350	2300	0.0555556	1	1	NA	DGST
454	Ferula narthex Boiss.	Apiaceae	Plantae	1800	2400	0.138889	4	5	NA	MENT, NERV, RESP
455	Ficus auriculata Lour.	Moraceae	Plantae	300	1800	0.222222	5	5	NA	DGST, FOOD, MTRL
456	Ficus benghalensis L.	Moraceae	Plantae	300	1200	0.138889	4	1	NA	FOOD, MTRL
457	Ficus benjamina L.	Moraceae	Plantae	300	2000	0.25	4	1	NA	DGST, FOOD, MTRL
458	Ficus cunia Buch.-Ham. ex Roxb.	Moraceae	Plantae	1500	2000	0.305556	4	7	NA	DERM, MTRL, URIN
459	Ficus drupacea Thunb.	Moraceae	Plantae	350	1500	0.0277778	5	1	NA	MTRL
460	Ficus hirta Vahl	Moraceae	Plantae	300	1200	0.138889	5	1	NA	FOOD, MTRL
461	Ficus hispida L. f.	Moraceae	Plantae	300	1200	0.0555556	5	1	NA	FOOD, MTRL, SPRT
462	Ficus hookeriana Corner	Moraceae	Plantae	300	1400	0.138889	4	1	NA	EDCR, FOOD, MTRL
463	Ficus neriifolia Sm.	Moraceae	Plantae	1500	2400	0.0555556	5	5	NA	MTRL
464	Ficus racemosa L.	Moraceae	Plantae	300	1700	0.194444	4	1	NA	DERM, DGST, EDCR, FOOD, MTRL
465	Ficus religiosa L.	Moraceae	Plantae	300	500	0.166667	4	7	NA	DGST, EDCR, FOOD, MTRL, URIN
466	Ficus sarmentosa Buch.-Ham. ex Sm.	Moraceae	Plantae	1400	2500	0.0833333	5	1	NA	DERM, FOOD, MTRL, SKEL
467	Ficus subincisa Buch.-Ham. ex Sm.	Moraceae	Plantae	1000	1500	0.0833333	5	3	NA	DGST, EDCR, FOOD, MTRL
468	Fistulina hepatica (Schaeff.) With.	Fistulinaceae	Fungi	300	2500	0.0833333	5	1	NA	FOOD
469	Flemingia macrophylla (Willd.) Merr.	Fabaceae	Plantae	700	1700	0.138889	4	1	NA	DERM, SKEL, SPRT, URIN, VETN
470	Flemingia stobilifera (L.) W. T. Aiton	Fabaceae	Plantae	300	1600	0.0833333	5	5	NA	DGST, SKEL
471	Flickingeria fimbriata (Blume) A. D. Hawkes.	Orchidaceae	Plantae	1100	2000	0.0555556	5	8	LC	DERM, SKEL
472	Floscopa scandens Lour.	Commelinaceae	Plantae	300	1800	0.0277778	5	1	NA	HEAR, OPTH
473	Foeniculum vulgare Mill.	Apiaceae	Plantae	1500	2500	0.138889	1	5	NA	DGST, FOOD, HEPT, PREG
474	Fragaria indica Wall.	Rosaceae	Plantae	2700	3800	0.0277778	5	1	NA	ORAL
475	Fragaria nubicola (Lindl. ex Hook. f.) Lacaita	Rosaceae	Plantae	1600	3800	0.0555556	5	1	NA	EDCR
476	Fragaria vesca L.	Rosaceae	Plantae	2200	3800	0.138889	5	5	NA	CIRC, DERM, DGST, FOOD, SKEL, URIN
477	Fraxinus floribunda Wall.	Oleaceae	Plantae	1200	2300	0.388889	5	1	NA	DERM, DGST, SKEL, VETN
478	Fritillaria cirrhosa D. Don	Liliaceae	Plantae	3000	4300	0.222222	5	6	NA	DERM, DGST, RESP
479	Galinsoga parviflora Cav.	Asteraceae	Plantae	300	2000	0.138889	3	1	NA	ANTI, DERM
480	Gallus gallus domesticus L.	Phasianidae	Animalia	300	3000	0.194444	1	5	NA	DERM, DGST, FOOD, HEPT, MTRL
481	Gamblea ciliata C.B. Clarke	Araliaceae	Plantae	2600	3300	0.0277778	5	5	NA	DERM
482	Garcinia cowa Roxb. ex Choisy	Clusiaceae	Plantae	300	1800	0.194444	1	1	NA	DGST, FOOD, MENT, NERV
483	Garcinia xanthochymus Hook. f. ex T. Anderson	Clusiaceae	Plantae	300	1400	0.0277778	1	1	NA	FOOD
484	Garra annandalei Hora	Cyprinidae	Animalia	300	1065	0.0277778	5	5	LC	FOOD
485	Garra gotyla gotyla F. Hamliton	Cyprinidae	Animalia	300	1065	0.0277778	5	5	LC	FOOD
486	Garra gotyla stenorhynchus Jerdon	Cyprinidae	Animalia	300	1065	0.0277778	5	5	LC	FOOD
487	Garra lamta F. Hamilton	Cyprinidae	Animalia	300	1065	0.0277778	5	5	LC	FOOD
488	Garra mullya Sykes	Cyprinidae	Animalia	300	1065	0.0277778	5	5	LC	FOOD
489	Garuga pinnata Roxb.	Burseraceae	Plantae	300	1500	0.222222	5	5	NA	CIRC, DERM, DGST, FOOD, OPTH, SKEL, RESP
490	Gastrodia elata Blume	Orchidaceae	Plantae	400	3200	0.0555556	5	6	VU	MENT, NERV, RESP
491	Gaultheria fragrantissima Wall.	Ericaceae	Plantae	1200	2800	0.138889	5	1	NA	DERM, DGST, FOOD, SKEL, RESP
492	Gaultheria griffithiana Wight	Ericaceae	Plantae	300	2600	0.0277778	5	1	NA	FOOD, VETN
493	Gaultheria hookeri C. B. Clarke	Ericaceae	Plantae	1600	3600	0.0555556	5	1	NA	FOOD, MTRL, VETN
494	Gaultheria nummularioides D. Don	Ericaceae	Plantae	1000	2000	0.0555556	5	3	NA	DGST, FOOD, MTRL
495	Gaultheria sinensis J. Anthony	Ericaceae	Plantae	3000	4300	0.0277778	5	1	NA	RESP
496	Gaultheria trichophylla Royle	Ericaceae	Plantae	3100	4800	0.0555556	5	1	NA	DERM, DGST, SKEL
497	Gentiana huxleyi Kusn.	Gentianaceae	Plantae	3800	4000	0.111111	5	7	NA	DERM, DGST
498	Geranium nepalense Sweet	Geraniaceae	Plantae	1400	3000	0.166667	5	5	NA	DERM, DGST, HEPT, URIN
499	Geranium polyanthes Edgew. & Hook. f.	Geraniaceae	Plantae	2400	4500	0.0277778	5	5	NA	DERM, DGST, HEPT, URIN
500	Geranium wallichianum D. Don ex Sweet	Geraniaceae	Plantae	2400	3600	0.0277778	5	5	NA	DGST, HEPT
501	Geum elatum Wall. var elatum forma elatum	Rosaceae	Plantae	2700	4500	0.0277778	5	1	NA	DERM
502	Girardinia diversifolia (Link.) Friis	Urticaceae	Plantae	1700	3000	0.333333	5	5	NA	CIRC, DERM, EDCR, FOOD, ORAL, RESP
503	Glochidion heyeanum (Wight & Arn.) Wight	Phyllanthaceae	Plantae	300	1800	0.0277778	5	1	NA	DGST
504	Glochidion lanceolarium Voigt.	Phyllanthaceae	Plantae	600	1500	0.0555556	5	1	NA	DERM, DGST
505	Gloriosa superba L.	Colchicaceae	Plantae	300	2200	0.194444	1	5	LC	ANTI, CIRC, DERM, DGST, PREG, SKEL, VETN
506	Glycine max (L.) Merr.	Fabaceae	Plantae	1500	2700	0.222222	1	5	NA	CIRC, DGST, FOOD
507	Glycosmis pentaphylla (Retz.) DC.	Rutaceae	Plantae	300	1200	0.0277778	5	5	NA	ANTI, ORAL
508	Glycyrrhiza glabra L.	Fabaceae	Plantae	500	1300	0.138889	1	5	NA	DGST, HEPT, URIN
509	Glyptothorax cavia F. Hamilton	Sisoridae	Animalia	300	525	0.0277778	5	7	LC	FOOD
510	Glyptothorax conirostris Steindachner	Sisoridae	Animalia	300	525	0.0277778	5	7	LC	FOOD
511	Glyptothorax gracilis Gunter	Sisoridae	Animalia	300	525	0.0277778	5	7	LC	FOOD
512	Glyptothorax sinense manipurensis Regan	Sisoridae	Animalia	300	525	0.0277778	5	7	LC	FOOD
513	Glyptothorax sinense sikkimensis Regan	Sisoridae	Animalia	300	525	0.0277778	5	7	LC	FOOD
514	Glyptothorax trilineatus Blyth	Sisoridae	Animalia	300	525	0.0277778	5	7	LC	FOOD
515	Gmelina arborea Roxb.	Lamiaceae	Plantae	300	1500	0.138889	5	5	NA	CIRC, DERM, MTRL, URIN
516	Gonostegia hirta (Blume ex Hassk.) Miq.	Urticaceae	Plantae	500	3200	0.0277778	5	5	NA	SKEL, URIN
517	Goodyera repens (L.) R.Br.	Orchidaceae	Plantae	700	3800	0.0555556	5	5	NA	DERM
518	Goodyera schlechtendaliana Rchb.f.	Orchidaceae	Plantae	500	2800	0.0555556	5	5	NA	CIRC, DERM
519	Gossypium arboreum L.	Malvaceae	Plantae	300	1500	0.0833333	5	5	NA	DERM, HEAR, RESP, SKEL
520	Gouania leptostachya DC.	Rhamnaceae	Plantae	300	2350	0.0555556	5	1	NA	MTRL
521	Grewia eriocarpa Juss.	Malvaceae	Plantae	400	1500	0.138889	5	1	NA	FOOD, MTRL
522	Grifola frondosa (Dicks.) Gray	Meripilaceae	Fungi	300	3450	0.0555556	5	1	NA	FOOD
523	Guizotia abyssinica (L. f.) Cass.	Asteraceae	Plantae	900	2000	0.0833333	1	1	NA	FOOD, MTRL
524	Guldenstaedtia himalaica Palib.	Fabaceae	Plantae	3221	4500	0.0277778	5	1	NA	DGST
525	Gymnadenia orchidis Lindl.	Orchidaceae	Plantae	2400	3600	0.166667	5	6	NA	DERM, DGST, FOOD
526	Gynocardia odorata R. Bri.	Achariaceae	Plantae	300	1200	0.416667	5	1	NA	DERM, EDCR, FOOD, NERV, SKEL, RESP
527	Haldina cordifolia (Roxb.) Ridsale	Rubiaceae	Plantae	300	800	0.0833333	5	3	NA	FOOD
528	Hauttuynia cordata Thumb.	Saururaceae	Plantae	1221	2500	0.0277778	5	1	NA	DGST, FOOD
529	Hedera nepalensis K. Koch.	Araliaceae	Plantae	1800	2800	0.111111	5	1	NA	DGST, EDCR
530	Hedychium coronarium J. Koenig	Zingiberaceae	Plantae	900	1900	0.194444	5	5	NA	DGST, FOOD, SKEL, RESP
531	Hedychium spicatum Sm.	Zingiberaceae	Plantae	1500	2700	0.222222	5	5	NA	CIRC, DGST, MTRL, NERV, RESP
532	Hedyotis scandens Roxb.	Rubiaceae	Plantae	600	2100	0.138889	5	5	NA	DERM, DGST, HEPT, OPTH, PREG, SKEL
533	Helianthus annus L.	Asteraceae	Plantae	300	1800	0.194444	1	5	NA	DERM, FOOD, HEPT, MENT, ORAL, RESP, URIN
534	Helicia nilagirica Bedd.	Proteaceae	Plantae	600	1800	0.0277778	5	1	NA	EDCR, RESP
535	Helwingia himalaica Hook. f. & Thomson ex C. B. Clarke	Helwingiaceae	Plantae	2130	3050	0.0277778	5	1	NA	EDCR, PREG
536	Hemiphragma heterophyllum Wall.	Plantaginaceae	Plantae	1800	3500	0.25	5	5	NA	FOOD, ORAL, RESP
537	Hemitragus jemlahicus Smith	Bovidae	Animalia	3700	4200	0.0277778	5	5	NT	DGST
538	Heracleum nepalense D. Don	Apiaceae	Plantae	1550	3500	0.194444	5	1	NA	SKEL, RESP
539	Heracleum wallichii DC.	Apiaceae	Plantae	1500	3300	0.583333	5	5	NA	CIRC, DGST, FOOD, RESP, SKEL
540	Heterodermia diademata (Taylor) Awasthi	Physciaceae	Fungi	410	3807	0.0277778	5	1	NA	FOOD
541	Heteropanax fragrans (Roxb.) Seem.	Araliaceae	Plantae	450	1200	0.0277778	5	5	NA	DERM
542	Heynea trijuga Roxb. ex Sims	Meliaceae	Plantae	500	2400	0.0277778	5	1	NA	DGST
543	Hibiscus rosa-sinensis L.	Malvaceae	Plantae	300	1800	0.111111	2	5	NA	DERM, FOOD, RESP, URIN
544	Hierococcyx varius Vahl	Cuculidae	Animalia	300	1000	0.0277778	5	3	LC	CULT
545	Himalayacalamus hookerianus (Munro) Stapleton	Poaceae	Plantae	1800	3200	0.0277778	5	1	NA	MTRL
546	Hippochaete debilis (Roxb. ex Vaucher) Ching	Elaeagnaceae	Plantae	300	3200	0.138889	3	1	NA	VETN
547	Hippophae salicifolia D. Don	Elaeagnaceae	Plantae	2210	4000	0.305556	4	1	NA	DERM, FOOD, ORAL, MTRL, RESP
548	Hippophae tibetana Schltdl.	Elaeagnaceae	Plantae	3221	4500	0.0555556	4	1	NA	DGST, EDCR, FOOD
549	Hodgsonia macrocarpa (Blume) Cogn.	Cucurbitaceae	Plantae	300	1200	0.0277778	5	1	NA	FOOD
550	Holarrhena pubescens Wall. ex G. Don	Apocynaceae	Plantae	300	600	0.527778	5	3	LC	ANTI, CIRC, DERM, DGST, HEPT, NEOP, PREG, SKEL, VETN
551	Holboellia latifolia Wall.	Berberidaceae	Plantae	1000	1800	0.111111	5	7	NA	DGST, FOOD, SKEL
552	Holmskioldia sanguinea Retz.	Lamiaceae	Plantae	300	1500	0.0277778	5	1	NA	NEOP
553	Homonoia riparia Lour.	Euphorbiaceae	Plantae	300	1000	0.0555556	5	7	LC	DGST, URIN
554	Hoplobatrachus tigerinus Daudin	Dicroglossidae	Animalia	-	-	0.0277778	5	5	LC	PREG
555	Hordeum vulgare L.	Poaceae	Plantae	300	2000	0.194444	1	1	NA	DGST
556	Horsfieldia kingii (Hook. f.) Warb	Myristicaceae	Plantae	300	800	0.0277778	5	3	NA	FOOD
557	Houttuynia cordata Thunb.	Saururaceae	Plantae	1200	2400	0.222222	5	5	NA	CIRC, DERM, DGST, EDCR, FOOD, HEPT, NERV, URIN
558	Houveniya dulcis Thunb.	Rhamnaceae	Plantae	300	1500	0.111111	5	1	NA	DGST, FOOD, MTRL
559	Hoya lanceolata Wall. ex D. Don	Apocynaceae	Plantae	1000	2000	0.0277778	5	7	NA	EDCR, RESP
560	Hoya linearis Wall. ex D. Don	Apocynaceae	Plantae	1500	2000	0.0277778	5	5	NA	RESP
561	Huperzia phlegmaria (L.) Rothm.	Lycopodiaceae	Plantae	300	2400	0.0555556	3	5	NA	VETN
562	Huperzia pulcherrima (Wall. ex Hook. & Grev.) T. Sen & U. Sen	Lycopodiaceae	Plantae	1100	1900	0.0277778	5	7	NA	DERM
563	Hydnum repandum L.	Hydnaceae	Fungi	1800	2500	0.0555556	5	1	NA	FOOD
564	Hydrangea aspera D. Don	Hydrangeaceae	Plantae	1800	2700	0.0277778	5	1	NA	DERM
565	Hydrocotyle himalaica P. K. Mukh.	Araliaceae	Plantae	1500	2500	0.166667	5	1	NA	CIRC, DGST, ORAL, OPTH, RESP, URIN
566	Hydrocotyle javanica Thunb.	Araliaceae	Plantae	500	2500	0.0833333	5	1	LC	FOOD, HEPT, URIN
567	Hydrocotyle sibthorpioides Lam.	Araliaceae	Plantae	600	2500	0.0277778	5	5	LC	CIRC, DGST, OPTH, RESP, URIN
568	Hymenodictyon orixense (Roxb.) Mabb.	Rubiaceae	Plantae	300	900	0.222222	5	3	NA	DERM, DGST, NEOP SKEL
569	Hyoscyamus niger L.	Solanaceae	Plantae	2100	3300	0.0277778	3	1	NA	ORAL
570	Hypericum choisianum Wall.	Hypericaceae	Plantae	2400	4120	0.0277778	5	1	NA	ANTI, DGST, NERV
571	Hypericum japonicum Thunb.	Hypericaceae	Plantae	800	2500	0.0555556	3	1	NA	ANTI, DGST, NERV
572	Hypericum patulum Thunb.	Hypericaceae	Plantae	914	1829	0.111111	3	1	NA	ANTI, DGST, NERV
573	Hypericum uralum Buch.-Ham. ex. D. Don	Hypericaceae	Plantae	1500	3350	0.0555556	3	5	NA	DERM, URIN
574	Hystrix brachyura L.	Hystricidae	Animalia	2000	2600	0.0833333	5	7	LC	CIRC, EDCR, RESP
575	Ichnocarpus frutescens (L.) W. T. Aiton	Apocynaceae	Plantae	300	1800	0.0277778	5	1	NA	ORAL, NERV, URIN
576	Ichthyophaga ichthyaetus Hors.	Accipitridae	Animalia	300	1500	0.0277778	5	5	NA	ANTI, DGST
577	Ilex dipyrena Wall.	Aquifoliaceae	Plantae	1800	2500	0.0555556	5	1	NA	FOOD, MTRL, URIN
578	Impatiens purpurea Handel-Mazzeti	Balsaminaceae	Plantae	2400	3300	0.0277778	5	1	NA	DERM, SKEL, URIN
579	Impatiens tripetala Roxb. ex DC.	Balsaminaceae	Plantae	300	1800	0.111111	5	1	NA	DERM, MTRL, URIN
580	Imperata cylindrica (L.) Raeusch.	Poaceae	Plantae	300	2400	0.194444	3	5	NA	HEPT, NERV, RESP, URIN, VETN
581	Indigofera cassioides DC.	Fabaceae	Plantae	700	3200	0.0555556	5	1	NA	FOOD
582	Ipomoea batatas (L) Lam.	Convolvulaceae	Plantae	300	1500	0.194444	2	5	NA	DERM, DGST, EDCR, FOOD
583	Ipomoea purpurea (L.) Roth	Convolvulaceae	Plantae	910	2100	0.0277778	2	5	NA	FOOD, NERV
584	Ipomoea quamoclit L.	Convolvulaceae	Plantae	300	1500	0.0555556	2	5	NA	DERM, DGST, OPTH
585	Iris clarkei Baker ex Hook. f.	Iridaceae	Plantae	2221	3500	0.0277778	4	5	NA	DERM
586	Iris decora Wall.	Iridaceae	Plantae	1800	4000	0.0277778	4	5	NA	DERM
587	Iris domestica (L.) Goldblatt & Mabb.	Iridaceae	Plantae	1000	2300	0.111111	1	5	NA	DERM
588	Iris ensata Thunb.	Iridaceae	Plantae	1500	3300	0.0277778	1	5	NA	DERM
589	Ithaginis cruentus Hardwicke	Phasianinae	Animalia	2500	4500	0.0555556	5	5	LC	DERM, DGST
590	Ixeris polycephala Cass.	Asteraceae	Plantae	750	1800	0.0277778	5	1	NA	DERM
591	Ixora coccinea L.	Rubiaceae	Plantae	300	500	0.0555556	1	3	NA	CIRC, DGST, NERV, PREG
592	Jasminum multiflorum (Burm. f.) Andrews	Oleaceae	Plantae	300	1200	0.0555556	4	5	NA	ANTI, CIRC, DGST, FOOD
593	Jatropha curcas L.	Euphorbiaceae	Plantae	300	1500	0.166667	1	1	NA	DERM, HEPT
594	Juglans regia L.	Juglandaceae	Plantae	1500	2500	0.611111	4	5	NT	DERM, DGST, FOOD, ORAL MTRL, NERV, PREG, VETN
595	Juniperus indica Bertol.	Cupressaceae	Plantae	3822	4660	0.0833333	5	1	LC	DERM, MTRL, SPRT
596	Juniperus recurva Buch.-Ham. Ex D. Don	Cupressaceae	Plantae	2900	4200	0.305556	5	1	LC	CIRC, DERM, DGST, FOOD, MTRL, SPRT
597	Justica adhatoda L.	Acanthaceae	Plantae	300	1500	0.25	5	5	NA	CIRC, DERM, FOOD, SKEL, RESP
598	Justicia gendarussa Burm. f.	Acanthaceae	Plantae	700	2500	0.0277778	1	5	NA	DERM, HEAR, RESP, URIN
599	Kadsura heteroclita (Roxb.) Craib	Schisandraceae	Plantae	500	2200	0.0555556	5	1	NA	FOOD
600	Kaempferia galanga L.	Zingiberaceae	Plantae	300	1500	0.0277778	5	5	NA	OPTH, SKEL
601	Kaempferia rotunda L.	Zingiberaceae	Plantae	900	1700	0.444444	5	5	NA	CIRC, DERM, SKEL
602	Knema cinerea var. glauca (Blume) Y. H. Li	Myristicaceae	Plantae	300	1000	0.0277778	5	3	NA	DGST
603	Kuehneromyces mutabilis (Schaef.) Singer & A.H. Sm.	Strophariaceae	Fungi	1800	2500	0.0277778	5	1	NA	FOOD
604	Kydia calycina Roxb.	Malvaceae	Plantae	350	1600	0.0555556	5	1	NA	CIRC, NERV, SKEL
605	Labeo dero F. Hamilton	Cyprinidae	Animalia	300	525	0.0277778	5	7	LC	FOOD
606	Labeo dyocheilus McClelland	Cyprinidae	Animalia	300	525	0.0277778	5	7	LC	FOOD
607	Labeo pangusia F. Hamilton	Cyprinidae	Animalia	300	525	0.0277778	5	7	NA	FOOD
608	Lactarius volemus (Fr.) Kuntze	Russulaceae	Fungi	300	3075	0.0833333	5	1	NA	FOOD
609	Lactifluus piperatus (L.) Roussel	Russulaceae	Fungi	1800	2500	0.0833333	5	1	NA	FOOD
610	Lactuca bracteata Wall.	Asteraceae	Plantae	2200	3600	0.0277778	3	1	NA	RESP
611	Lactuca virosa Habl.	Asteraceae	Plantae	1000	2300	0.0277778	3	1	NA	NERV, RESP
612	Laetiporus sulphureus (Bull.) Murr.	Polyporaceae	Fungi	300	2500	0.0555556	5	1	NA	FOOD
613	Lagerstroemia speciosa (L.) Pers.	Lythraceae	Plantae	500	2200	0.0555556	5	5	NA	ORAL, MTRL
614	Lannea coromandelica (Houtt.) Merr.	Anacardiaceae	Plantae	300	1400	0.0277778	5	1	NA	DERM, ORAL, SKEL
615	Lantana camara L.	Verbenaceae	Plantae	300	1700	0.111111	2	5	NA	CIRC, DERM, DGST, HEPT, ORAL, SKEL, RESP
616	Laphangium affine (D. Don) Tzvelev	Asteraceae	Plantae	1200	3000	0.0555556	3	1	NA	NERV
617	Laportea bulbifera (Siebold & Zucc.) Wedd.	Urticaceae	Plantae	1900	3300	0.138889	5	1	NA	CIRC, FOOD
618	Lasia spinosa (L.) Thwaites	Araceae	Plantae	300	1400	0.0277778	5	5	LC	ORAL, VETN
619	Lasianthus hirsutus (Roxb.) Merr.	Rubiaceae	Plantae	1800	4100	0.0277778	3	1	NA	MTRL
620	Launaea aspleniifolia (Willd.) Hook. f.	Asteraceae	Plantae	300	1500	0.0277778	5	1	NA	DERM, DGST
621	Laurocerasus undulata (Buch.-Ham. ex D. Don) M. Roem	Rosaceae	Plantae	2400	3600	0.0277778	5	1	NA	FOOD
622	Lawsonia inermis L.	Lythraceae	Plantae	300	750	0.0555556	1	7	NA	DERM, FOOD, HEPT, MTRL, NERV, URIN
623	Lecanthus peduncularis (Wall. ex Royle) Wedd.	Urticaceae	Plantae	1200	3200	0.0555556	5	1	NA	VETN
624	Leea aequata L.	Vitaceae	Plantae	300	1100	0.0555556	5	5	NA	DERM, MTRL, RESP
625	Leea macrophylla Roxb. ex Hornem.	Vitaceae	Plantae	300	1400	0.305556	5	5	NA	ANTI, DERM, DGST, FOOD, SKEL, VETN
626	Leea sambucina Willd.	Vitaceae	Plantae	300	1300	0.0555556	5	5	NA	FOOD, VETN
627	Lens culinaris Medik.	Fabaceae	Plantae	300	1000	0.0833333	1	3	NA	FOOD
628	Lepidium didymum L.	Brassicaceae	Plantae	300	1700	0.111111	3	5	NA	FOOD, SKEL, URIN
629	Lepidoptera spp.	-	Animalia	-	-	0.0277778	5	5	-	ANTI, RESP
630	Leucosceptrum canum Sm.	Lamiaceae	Plantae	1500	2400	0.111111	5	5	NA	DERM, FOOD, NERV
631	Ligularia thomsonii (C. B. Clarke) Pojark.	Asteraceae	Plantae	1500	3800	0.0277778	5	1	NA	CIRC
632	Lindenbergia grandiflora (Buch.-Ham ex D. Don) Benth.	Plantaginaceae	Plantae	700	2400	0.0277778	5	1	NA	HEPT
633	Lindera neesiana (Wall. ex Nees) Kurz	Lauraceae	Plantae	1800	2500	0.305556	5	5	NA	CIRC, DGST, EDCR
634	Liparis odorata (Willd.) Lindl.	Orchidaceae	Plantae	600	3100	0.0555556	5	1	NA	DERM, ORAL, NEOP
635	Lithocarpus pachyphyllus (Kurz) Rehder	Fagaceae	Plantae	1800	2500	0.0555556	5	5	NA	MTRL, SKEL
636	Litsea cubeba (Lour.) Pers.	Lauraceae	Plantae	300	1700	0.583333	5	1	NA	DERM, DGST, EDCR, FOOD, SKEL
637	Litsea elongata (Nees) Hook. f.	Lauraceae	Plantae	1800	2600	0.0833333	5	5	NA	DERM, FOOD, SKEL
638	Litsea glutinosa (Lour.) C. B. Rob	Lauraceae	Plantae	900	1700	0.111111	5	5	NA	DGST, MTRL
639	Litsea monopetala (Roxb.) Pers.	Lauraceae	Plantae	300	1500	0.138889	5	1	NA	DGST, MTRL, RESP
640	Litsea salicifolia (J. Roxb. ex Nees) Hook. f.	Lauraceae	Plantae	300	1050	0.0555556	5	1	NA	ANTI, DGST, MTRL
641	Lobelia nicotianifolia Roth ex Schult.	Campanulaceae	Plantae	1100	2500	0.0833333	5	1	NA	NERV
642	Lobelia nummularia Lam.	Campanulaceae	Plantae	2000	3000	0.0833333	5	1	NA	NERV
643	Luculia pinceana Hook.	Rubiaceae	Plantae	300	600	0.0277778	5	3	NA	SPRT
644	Luffa acutangula (L.) Roxb.	Cucurbitaceae	Plantae	300	1700	0.111111	1	1	NA	DGST, FOOD, OPTH
645	Luffa cylindrica (L.) M. Roem.	Cucurbitaceae	Plantae	300	1500	0.111111	1	1	NA	FOOD, RESP, URIN
646	Luisia tristis (G. Forst.) Hook. f.	Orchidaceae	Plantae	300	1000	0.0277778	5	3	NA	DERM
647	Lycoperdon perlatum Pers.	Agaricaceae	Fungi	1800	2500	0.0277778	5	1	NA	FOOD
648	Lycoperdon pyriforme Schaeff.	Agaricaceae	Fungi	1800	4750	0.0277778	5	1	NA	FOOD
649	Lycopersicon esculentum Mill.	Solanaceae	Plantae	300	1700	0.222222	1	1	NA	DERM, DGST, FOOD, NERV, SKEL, VETN
650	Lycopodiella cernua (L.) Pic. Serm.	Lycopodiaceae	Plantae	300	2300	0.0277778	5	5	NA	CIRC, DERM, SKEL
651	Lycopodium clavatum L.	Lycopodiaceae	Plantae	700	2000	0.305556	5	5	NA	CIRC, DERM, DGST, MTRL, SKEL, SPRT, URIN
652	Lyonia ovalifolia (Wall.) Drude	Ericaceae	Plantae	600	3000	0.305556	5	5	NA	ANTI, DERM
653	Lyonia villosa (Wall. ex C. B. Clarke) Hand.-Mazz	Ericaceae	Plantae	2500	4000	0.0277778	5	5	NA	DERM
654	Macaca mulatta Zimm.	Cercopithecidae	Animalia	300	3700	0.0833333	5	5	LC	CIRC, EDCR, DGST, RESP
655	Macaranga pustulata Wight	Euphorbiaceae	Plantae	1200	2200	0.0833333	5	5	NA	MTRL
656	Machilus edulis King ex Hook. f.	Lauraceae	Plantae	1220	2500	0.305556	4	1	NA	FOOD
657	Macrotyloma uniflorum (Lam.) Verdc.	Fabaceae	Plantae	300	1000	0.0555556	1	3	NA	FOOD
658	Maesa chisia Buch.-Ham. ex D. Don	Primulaceae	Plantae	900	2600	0.222222	5	5	NA	ANTI, DERM, DGST, FOOD, MTRL, VETN
659	Magnolia champaca (L.) Baill. ex Pierre	Magnoliaceae	Plantae	600	1300	0.222222	5	1	LC	ANTI, DERM, DGST, ORAL, MTRL, OPTH, SKEL, RESP, URIN
660	Magnolia doltsopa (Buch.-Ham. ex DC.) Figlar	Magnoliaceae	Plantae	1000	2500	0.138889	5	1	NA	MTRL
661	Magnolia lanuginosa (Wall.) Figlar & Noot.	Magnoliaceae	Plantae	1700	2800	0.0277778	5	1	NA	MTRL
662	Mahonia sikkimensis DC. ex Dippel.	Berberidaceae	Plantae	2000	2900	0.333333	5	1	NA	DGST, FOOD, HEPT, OPTH, URIN
663	Maianthemum oleraceum (Baker) LaFrankie	Asparagaceae	Plantae	2210	3400	0.0277778	5	5	NA	DERM
664	Malaxis muscifera (Lindl.) Kuntze	Orchidaceae	Plantae	2000	3700	0.0833333	5	6	VU	SKEL
665	Mallotus philippensis (Lam.) Muell. Arg.	Euphorbiaceae	Plantae	300	1600	0.25	5	1	NA	DERM, DGST, HEAR, VETN
666	Mallotus repandus (Willd.) Mull. Arg.	Euphorbiaceae	Plantae	300	1400	0.0277778	5	1	NA	DERM, HEAR
667	Malus sikkimensis (Wenz.) Koehne ex C. K. Schneid.	Rosaceae	Plantae	1800	3000	0.0555556	5	1	NA	FOOD
668	Malvaviscus arboreus Cav.	Malvaceae	Plantae	300	1800	0.0555556	1	1	NA	FOOD
669	Mandragora caulescens C. B. Clarke	Solanaceae	Plantae	2200	4200	0.0277778	5	5	NA	SPRT
670	Mangifera indica L.	Anacardiaceae	Plantae	300	1500	0.222222	1	5	NA	CIRC, DERM, DGST, FOOD, HEPT, RESP, URIN
671	Mangifera sylvatica Roxb.	Anacardiaceae	Plantae	900	1370	0.0555556	4	1	LC	DGST, FOOD
672	Marmota bobak Muller	Sciuridae	Animalia	3700	4500	0.0277778	5	5	LC	CULT, DGST, EDCR
673	Marsdenia roylei Wight	Apocynaceae	Plantae	900	2400	0.222222	5	5	NA	DGST, URIN
674	Marsdenia tenacissima (Roxb.) Moon	Apocynaceae	Plantae	700	1700	0.0833333	5	5	NA	DGST, URIN
675	Marsdenia tinctoria R. Br	Apocynaceae	Plantae	400	1200	0.0555556	5	5	NA	DGST
676	Mazus pumilus (Burmam) Steenis	Phrymaceae	Plantae	1200	3800	0.0555556	5	1	NA	DGST, RESP
677	Meconopsis horridula Hook. f. & Thomson	Papaveraceae	Plantae	2210	4800	0.0833333	5	1	NA	NERV
678	Meconopsis simplicifolia (D. Don) Walp.	Papaveraceae	Plantae	2210	5300	0.0833333	5	5	NA	DERM, RESP, URIN
679	Melastoma malabathricum L.	Melastomataceae	Plantae	500	1500	0.166667	5	1	NA	DGST, VETN
680	Melia azedarach L.	Meliaceae	Plantae	300	2320	0.166667	4	5	NA	CIRC, DGST, FOOD, HEAR, PREG
681	Melissa axillaris (Benth.) Bakh. f.	Lamiaceae	Plantae	1000	3600	0.0555556	5	1	NA	ANTI, DERM, MENT, ORAL
682	Mentha arvensis L.	Lamiaceae	Plantae	1200	2000	0.111111	2	1	NA	DGST, NERV
683	Mentha longifolia (L.) L.	Lamiaceae	Plantae	1500	3800	0.0555556	3	1	LC	DGST, NERV, RESP, SKEL
684	Mentha spicata L.	Lamiaceae	Plantae	300	2000	0.138889	1	1	LC	DERM, DGST, NERV
685	Mentha X piperata L.	Lamiaceae	Plantae	500	2000	0.194444	1	1	NA	DERM, DGST, FOOD, NERV, SKEL, VETN
686	Meripilus giganteus Karst.	Fomitopsidaceae	Fungi	1800	2500	0.0833333	5	1	NA	FOOD
687	Merrilliopanax alpinus (C. B. Clarke) C. B. Shang	Araliaceae	Plantae	1800	3100	0.0277778	5	1	NA	DGST
688	Mesua ferrea L.	Calophyllaceae	Plantae	300	1500	0.25	4	1	NA	ANTI, DERM, EDCR, PREG, SKEL
689	Meyna laxiflora Robyns	Rubiaceae	Plantae	2000	3000	0.0277778	5	1	NA	DERM, DGST, SKEL
690	Mikania micrantha Kunth	Asteraceae	Plantae	300	1500	0.0277778	3	1	NA	ANTI, DERM, MTRL
691	Mimosa pudica L.	Fabaceae	Plantae	300	1200	0.361111	2	5	LC	CIRC, DERM, DGST, EDCR, HEPT, RESP, URIN
692	Mirabilis jalapa L.	Nyctaginaceae	Plantae	400	1800	0.0833333	1	1	NA	EDCR, SKEL
693	Molineria capitulata (Lour.) Herb.	Hypoxidaceae	Plantae	1800	2000	0.0277778	5	1	NA	DERM
694	Momordica charantia L.	Cucurbitaceae	Plantae	300	2100	0.333333	1	5	NA	CIRC, DGST, EDCR, FOOD, OPTH, SKEL, RESP
695	Momordica cochinchinensis (Lour.) Spreng.	Cucurbitaceae	Plantae	300	1500	0.138889	1	1	NA	ANTI, FOOD, HEPT
696	Momordica dioica Roxb. ex. Willd	Cucurbitaceae	Plantae	300	1100	0.0277778	1	5	NA	ANTI, CIRC, RESP, URIN
697	Monstera deliciosa Liebm.	Araceae	Plantae	1221	2000	0.0277778	5	1	NA	DGST, FOOD
698	Morinda angustifolia Roxb.	Rubiaceae	Plantae	300	800	0.0833333	5	7	NA	DGST, MTRL, RESP
699	Moringa oleifera Lam.	Moringaceae	Plantae	300	2000	0.194444	4	5	NA	ANTI, CIRC, DGST, FOOD, HEAR, NERV, OPTH, RESP, URIN
700	Morus australis Poir.	Moraceae	Plantae	300	2000	0.0277778	4	1	NA	DGST
701	Morus indica L.	Moraceae	Plantae	500	2000	0.166667	4	1	NA	CIRC, DERM, DGST, EDCR, ORAL, URIN
702	Morus macroura Miq.	Moraceae	Plantae	1200	1700	0.166667	4	3	NA	EDCR, FOOD
703	Morus nigra L.	Moraceae	Plantae	300	2000	0.0555556	4	1	NA	DGST, FOOD
704	Moschus chrysogaster Hodgson	Moschidae	Animalia	3700	4500	0.0555556	5	6	EN	SKEL, MTRL
705	Moschus leucogaster Hodgson	Moschidae	Animalia	2500	4500	0.0555556	5	6	EN	DGST, MTRL
706	Mucuna monosperma Wight	Fabaceae	Plantae	320	2100	0.0833333	5	1	NA	CIRC, DGST
707	Mucuna puriens (L.) DC.	Fabaceae	Plantae	300	1500	0.111111	5	1	NA	ANTI, DERM, DGST, URIN
708	Murdannia nudiflora (L.) Brenan	Commelinaceae	Plantae	300	1500	0.0277778	5	1	NA	SKEL
709	Murraya koenigii (L.) Spreng.	Rutaceae	Plantae	300	1000	0.138889	1	7	NA	ANTI, CIRC, DERM, DGST, FOOD, SKEL
710	Mus musculus L.	Muridae	Animalia	300	3500	0.0277778	5	5	LC	DGST
711	Musa balbisiana Colla	Musaceae	Plantae	300	1600	0.166667	5	5	NA	DERM, DGST, FOOD, ORAL, RESP
712	Musa sikkimensis Kurz	Musaceae	Plantae	300	1800	0.0277778	5	5	NA	DGST, FOOD
713	Musa X paradisiaca L.	Musaceae	Plantae	300	1700	0.166667	1	5	NA	DGST, FOOD, URIN
714	Mussaenda frondosa L.	Rubiaceae	Plantae	1000	2000	0.0555556	5	7	NA	DERM, HEPT, RESP
715	Mussaenda glabrata (Hook. f.) Hutch. ex Gamble	Rubiaceae	Plantae	1200	2000	0.0277778	5	7	NA	HEPT, VETN
716	Mussaenda macrophylla Wall.	Rubiaceae	Plantae	300	1300	0.0277778	5	5	NA	HEPT
717	Mussaenda roxburghii Hook. f.	Rubiaceae	Plantae	400	2300	0.0833333	5	5	NA	DERM, FOOD, HEPT, ORAL
718	Mussaenda treutleri Stapf	Rubiaceae	Plantae	400	1700	0.0555556	5	5	NA	HEPT
719	Mycaranthes pannea (Lindl.) S. C. Chen & J. J. Wood	Orchidaceae	Plantae	600	1000	0.0277778	5	7	NA	DERM, SKEL
720	Myophonus caeruleus Scop.	Muscicapidae	Animalia	1500	2200	0.0277778	5	5	LC	DGST
721	Myriactis nepalensis Less.	Asteraceae	Plantae	2400	3600	0.0277778	5	1	NA	DERM
722	Myrica esculenta Buch-Ham. ex D. Don	Myricaceae	Plantae	300	2500	0.138889	5	1	NA	DGST, RESP
723	Myrica gale L.	Myricaceae	Plantae	1100	2000	0.0555556	3	3	NA	FOOD
724	Myristica fragrans Houtt.	Myristicaceae	Plantae	300	700	0.0277778	1	3	NA	FOOD, NERV
725	Nardostachys jatamansi (D. Don) DC.	Caprifoliaceae	Plantae	3200	5000	0.75	4	6	CR	DERM, DGST, EDCR, HEPT, MENT, ORAL, NERV, RESP, SPRT, URIN
726	Nasturtium officinale R. Br.	Brassicaceae	Plantae	1500	3500	0.444444	4	1	LC	CIRC, FOOD, HEPT, RESP, URIN
727	Neolamarckia cadamba (Roxb.) Bosser	Rubiaceae	Plantae	300	1000	0.0277778	5	3	NA	MTRL
728	Neolissochilus hexagonolepis McClelland	Cyprinidae	Animalia	300	700	0.0277778	5	7	NT	FOOD
729	Neolissochilus hexastichus McClelland	Cyprinidae	Animalia	300	700	0.0555556	5	7	NT	FOOD
730	Neopicrorhiza scrophulariiflora (Pennell) D. Y. Hong	Plantaginaceae	Plantae	2800	4000	0.305556	5	5	NA	HEPT, NERV
731	Nephrolepis cordifolia Trimen	Nephrolepidaceae	Plantae	300	2000	0.0555556	5	1	NA	EDCR, RESP
732	Nerium oleander L.	Apocynaceae	Plantae	300	1500	0.0555556	1	5	LC	CIRC, DERM, EDCR, NEOP, URIN
733	Nicotiana tabacum L.	Solanaceae	Plantae	300	2000	0.0833333	1	1	NA	DERM, ORAL, MTRL
734	Nigella sativa L.	Ranunculaceae	Plantae	300	1500	0.0277778	1	1	NA	CIRC, DGST, FOOD
735	Nycatanthes arbortistis L.	Oleaceae	Plantae	300	1500	0.222222	5	1	NA	ANTI, CIRC, DERM, DGST, EDCR, OPTH
736	Ocimum basilicum L.	Lamiaceae	Plantae	300	1700	0.222222	1	5	NA	ANTI, DGST, EDCR, RESP
737	Ocimum gratissimum L.	Lamiaceae	Plantae	400	1200	0.0277778	1	1	NA	DERM, DGST, EDCR, RESP, URIN
738	Ocimum tenuiflorum L.	Lamiaceae	Plantae	300	1800	0.194444	1	1	NA	DGST, EDCR, FOOD, RESP
739	Oenanthe javanica (Blume) DC.	Apiaceae	Plantae	600	3600	0.0277778	3	1	LC	DGST
740	Oldenlandia corymbosa L.	Rubiaceae	Plantae	300	2400	0.0277778	5	1	LC	DGST
741	Onosma hookeri C. B. Clarke	Boraginaceae	Plantae	2210	3700	0.0833333	5	5	NA	DERM
742	Ophiocordyceps sinensis (Berk.) G. H. Sung, J. M. Sung, Hywel-Jones & Spatafora	Ophiocordyceps	Fungi	4500	7000	0.222222	5	8	NA	CIRC, DGST, EDCR, HEPT, NERV, RESP, URIN
743	Ophioglossum petiolatum Hook.	Ophioglossaceae	Plantae	1500	2700	0.0277778	5	5	NA	CIRC, DERM, FOOD, NERV
744	Ophiorrhiza treutleri Hook. f.	Rubiaceae	Plantae	1700	2700	0.0277778	5	1	NA	URIN
745	Opuntia ficus-indica (L.) Mill.	Cactaceae	Plantae	300	1800	0.0277778	2	1	NA	DERM, DGST, FOOD, URIN
746	Opuntia monacantha (Willd.) Haw.	Cactaceae	Plantae	700	1800	0.0833333	2	1	LC	DERM, DGST, FOOD, RESP, URIN
747	Oroxylum indicum (L.) Kurz	Bignoniaceae	Plantae	400	1500	0.861111	5	2	NA	DERM, DGST, EDCR, FOOD, ORAL, NERV, PREG, RESP, SKEL, URIN, VETN
748	Oryza sativa L.	Poaceae	Plantae	300	2500	0.194444	1	1	NA	FOOD
749	Osbeckia nepalensis Hook.f.	Melastomataceae	Plantae	450	2300	0.166667	5	1	NA	DERM, ORAL, SKEL
750	Osyris lanceolata Hochst. & Steud.	Santalaceae	Plantae	1100	2600	0.166667	5	1	NA	DERM, DGST, FOOD, SKEL
751	Oudemansiella mucida (Schrad.) Hohn	Physalacriaceae	Fungi	1800	2500	0.0277778	5	1	NA	FOOD
752	Ovis aries L.	Bovidae	Animalia	300	3000	0.138889	1	5	NA	DERM, DGST, MTRL
753	Oxalis corniculata L.	Oxalidaceae	Plantae	300	2900	0.388889	3	5	NA	CIRC, DERM, DGST, HEPT, PREG, SKEL, VETN
754	Oxyria digyna (L.) Hill	Polygonaceae	Plantae	2400	5000	0.0555556	5	1	NA	FOOD
755	Oxyspora paniculata (D. Don) DC.	Melastomataceae	Plantae	700	2300	0.0555556	5	1	NA	SKEL
756	Paederia foetida L.	Rubiaceae	Plantae	300	1800	0.305556	5	5	NA	DGST, EDCR, FOOD, ORAL, MTRL, SKEL, SPRT
757	Paeonia emodi Royle	Paeoniaceae	Plantae	1800	2500	0.0277778	5	1	NA	FOOD
758	Panax bipinnatifidus Seem.	Araliaceae	Plantae	2400	5000	0.472222	4	6	NA	CIRC, DERM, DGST, EDCR, NEOP, URIN
759	Pandanus furcatus Roxb.	Pandanaceae	Plantae	300	1500	0.25	5	1	NA	DERM, FOOD, RESP
760	Papilionanthe teres Roxb. Schltr.	Orchidaceae	Plantae	500	900	0.0555556	5	3		CIRC, NERV
761	Paramignya monophylla Wight	Rutaceae	Plantae	400	900	0.0277778	5	3	NA	VETN
762	Paris polyphylla Sm.	Melanthiaceae	Plantae	2000	3500	0.194444	5	5	NA	ANTI, DERM, DGST, EDCR
763	Parmotrema nilgherrense (Nyl.) Haw.	Parmeliaceae	Fungi	1080	2800	0.0555556	5	5	NA	RESP
764	Parmotrema reticulatum (Taylor) M. Choisy	Parmeliaceae	Fungi	1500	2500	0.0555556	5	5	NA	RESP
765	Parochetus communis D. Don	Fabaceae	Plantae	900	4300	0.0277778	5	1	LC	DGST
766	Parthenocissus semicordata (Wall.) Planch	Vitaceae	Plantae	2000	3800	0.0555556	5	1	NA	FOOD
767	Passiflora edulis Sims	Passifloraceae	Plantae	300	1750	0.166667	1	1	NA	DGST, FOOD, HEPT, MENT, NERV
768	Passiflora nepalensis Walp.	Passifloraceae	Plantae	1200	2000	0.138889	4	1	NA	FOOD, NERV
769	Pavetta tomentosa Roxb. ex Sm.	Rubiaceae	Plantae	300	1500	0.0833333	5	5	NA	DGST, HEPT, SKEL, URIN
770	Pedicularis gracilis Wall. ex Benth.	Orobanchaceae	Plantae	2200	3700	0.0277778	5	1	NA	DERM, URIN
771	Pedicularis longiflora Rudolph	Orobanchaceae	Plantae	2500	5000	0.0277778	5	1	NA	DERM, EDCR
772	Pedicularis pectinata Wall. ex Benn.	Orobanchaceae	Plantae	3800	4000	0.0277778	5	3	NA	CIRC, URIN
773	Pegia nitida Colebr.	Anacardiaceae	Plantae	500	1800	0.0277778	5	1	NA	FOOD
774	Peltigera polydactyla (Neck.) Hoffm.	Peltigeraceae	Fungi	1950	2920	0.0277778	5	5	NA	RESP
775	Peperomia hyneana Miq.	Piperaceae	Plantae	2000	3000	0.0555556	5	1	NA	MTRL, RESP
776	Peperomia reflexa Kunth	Piperaceae	Plantae	1000	2500	0.0277778	5	1	NA	CIRC
777	Pericampylus glaucus (Lam.) Merr.	Menispermaceae	Plantae	700	1500	0.0555556	5	5	NA	ANTI, EDCR
778	Perilla frutescens (L.) Britton	Lamiaceae	Plantae	600	2400	0.111111	5	1	NA	ANTI, DERM, DGST, RESP
779	Persea americana Mill.	Lauraceae	Plantae	500	1500	0.0555556	2	1	NA	CIRC, DERM, DGST, HEPT
780	Persea macrantha (Nees) Kosterm.	Lauraceae	Plantae	300	2000	0.0277778	2	1	NA	FOOD
781	Persea odoratissima (Nees) Kosterm.	Lauraceae	Plantae	1500	2100	0.0277778	5	3	NA	FOOD
782	Persicaria capitata (Buch.-Ham. ex. D. Don) H. Gross	Polygonaceae	Plantae	600	2500	0.0555556	5	1	NA	ANTI, DGST
783	Persicaria hydropiper L. Delarbre	Polygonaceae	Plantae	900	2300	0.0277778	3	1	LC	EDCR
784	Persicaria punctata (Elliott) Small	Polygonaceae	Plantae	1200	4100	0.0555556	3	1	NA	EDCR
785	Persicaria vivipara (L.) Ronse Decr.	Polygonaceae	Plantae	3221	5000	0.0833333	5	1	NA	FOOD
786	Petaurista magnificus Hodgson	Sciuridae	Animalia	2000	3000	0.0555556	5	5	LC	DGST, RESP
787	Peziza badia Pers.	Pezizaceae	Fungi	1800	2500	0.0277778	5	1	NA	FOOD
788	Phaius tankervilleae (Banks) Blume	Orchidaceae	Plantae	500	1100	0.0555556	5	3	NA	SKEL
789	Phlogacanthus pubinervius T. Anderson	Acanthaceae	Plantae	300	1700	0.0277778	5	1	NA	FOOD
790	Phlogacanthus thyrsiflorus Nees	Acanthaceae	Plantae	300	1500	0.111111	5	1	NA	CIRC, DERM, DGST, EDCR, FOOD, HEPT, RESP
791	Phoenix acaulis Roxb.	Arecaceae	Plantae	700	1400	0.0277778	5	1	NA	FOOD
792	Phoenix rupicola T. Anderson	Arecaceae	Plantae	300	1450	0.0277778	5	1	NT	FOOD
793	Pholidota imbricata Lindl.	Orchidaceae	Plantae	800	2700	0.0555556	5	5		SKEL
794	Phyllanthus emblica L.	Phyllanthaceae	Plantae	300	1650	0.472222	4	1	NA	DERM, DGST, FOOD, PREG, SKEL, URIN
795	Physalis divaricata D. Don	Solanaceae	Plantae	300	1700	0.0833333	5	1	NA	DGST, HEAR, URIN
796	Physalis minima L.	Solanaceae	Plantae	1000	1800	0.222222	3	3	NA	ORAL, VETN
797	Phytolacca acinosa Roxb.	Phytolaccaceae	Plantae	1200	3000	0.472222	5	5	NA	ANTI, CIRC, DERM, DGST, FOOD, ORAL, SKEL, URIN
798	Picrorhiza kurroaa Royle ex Benth.	Plantaginaceae	Plantae	2700	4800	0.638889	4	6	NA	ANTI, CIRC, DGST, EDCR, NERV, RESP, SKEL, SPRT, URIN, VETN
799	Pieris formosa (Wall.) D. Don	Ericaceae	Plantae	2000	3500	0.0555556	5	5	NA	DERM, SPRT, VETN
800	Pilea bracteosa Wedd.	Urticaceae	Plantae	1200	3202	0.0555556	5	1	NA	SKEL
801	Pilea microphylla (L.) Liebm.	Urticaceae	Plantae	1600	2350	0.0277778	3	1	NA	DERM, SKEL, SPRT
802	Pimpinella diversifolia DC.	Apiaceae	Plantae	300	3300	0.0277778	5	1	NA	DGST
803	Pinus roxburghii Sarg.	Pinaceae	Plantae	1000	2500	0.111111	5	1	LC	DERM, RESP, SKEL
804	Piper betle L.	Piperaceae	Plantae	300	1000	0.0833333	4	3	NA	DERM, SKEL
805	Piper boehmeriifolium (Miq.) Wall. ex C. DC.	Piperaceae	Plantae	500	2200	0.0833333	5	1	NA	SKEL
806	Piper longum L.	Piperaceae	Plantae	300	1700	0.611111	4	5	NA	ANTI, DERM, DGST, FOOD, HEPT, ORAL, NEOP, NERV, PREG, RESP, SKEL, URIN, VETN
807	Piper nigrum L.	Piperaceae	Plantae	800	1500	0.111111	1	1	NA	DGST, FOOD
808	Piper pedicellatum C. DC.	Piperaceae	Plantae	350	2200	0.0277778	5	6	VU	EDCR, ORAL
809	Piper peepuloides Wall.	Piperaceae	Plantae	350	1600	0.0833333	5	6	NA	EDCR, ORAL
810	Piper retrofractum Vahl	Piperaceae	Plantae	300	1800	0.0555556	5	5	NA	DERM, DGST, RESP
811	Piper suipigua Buch.-Ham. ex D. Don	Piperaceae	Plantae	300	2000	0.0277778	5	1	NA	FOOD
812	Pittosporum napaulense (DC.) Rehder & E. H. Wilson	Pittosporaceae	Plantae	1000	2300	0.0555556	5	1	NA	ANTI, SKEL
813	Plantago asiatica subsp. erosa (Wall.) Z. Yu Li	Plantaginaceae	Plantae	300	3100	0.222222	5	5	NA	DERM, DGST
814	Plantago major L.	Plantaginaceae	Plantae	930	2170	0.25	3	1	NA	DERM, DGST, ORAL, VETN
815	Platostoma hispidum (L.) A.J. Paton	Lamiaceae	Plantae	500	1900	0.0277778	5	1	NA	DERM
816	Pleione maculata (Lindl.) Lindl. & Paxton	Orchidaceae	Plantae	500	1800	0.0277778	5	6	NA	DERM, SKEL
817	Pleione praecox (Sm.) D. Don	Orchidaceae	Plantae	1500	3400	0.0277778	5	5	NA	DERM
818	Pleurotus citrinopileatus Singer	Pleurotaceae	Fungi	300	2500	0.0833333	1	1	NA	FOOD
819	Pleurotus cornucopiae (Paulet) Rolland	Pleurotaceae	Fungi	300	2500	0.0833333	1	1	NA	FOOD
820	Pleurotus flabellatus (Berk. & Broome) Sacc.	Pleurotaceae	Fungi	300	2500	0.0833333	1	1	NA	FOOD
821	Pleurotus florida (Mont.) Singer	Pleurotaceae	Fungi	300	2500	0.0833333	1	1	NA	FOOD
822	Pleurotus ostreatus (Jacq. ex Fr.) P. Kumm.	Pleurotaceae	Fungi	300	3085	0.111111	1	1	NA	FOOD
823	Pleurotus sajor-caju Fr.	Pleurotaceae	Fungi	300	2500	0.0833333	1	1	NA	FOOD
824	Pleurotus sapidus (Schulzer) Sacc.	Pleurotaceae	Fungi	300	2500	0.0833333	1	1	NA	FOOD
825	Plumbago indica L.	Plumbaginaceae	Plantae	300	1600	0.0833333	5	5	NA	DERM, SKEL, URIN
826	Plumbago zeylanica L.	Plumbaginaceae	Plantae	300	1600	0.0555556	5	5	NA	DGST, PREG, SKEL
827	Plumeria rubra L.	Apocynaceae	Plantae	300	1200	0.0555556	1	1	NA	HEPT, SKEL, URIN
828	Polygala arillata Buch.-Ham. ex. D. Don	Polygalaceae	Plantae	1300	2700	0.222222	5	5	NA	ANTI, DERM, DGST, MTRL, RESP
829	Polygonatum cirrhifolium (Wall.) Royle	Asparagaceae	Plantae	1700	4600	0.0555556	5	1	NA	DGST, FOOD, NERV, RESP
830	Polygonatum oppositifolium (Wall.) Royle	Asparagaceae	Plantae	1800	2200	0.0277778	5	1	NA	DGST
831	Polygonum molle D. Don	Polygonaceae	Plantae	1200	3500	0.25	5	1	NA	DERM, DGST, FOOD
832	Polygonum perfoliatum L.	Polygonaceae	Plantae	1200	2200	0.0555556	5	1	NA	DGST, FOOD
833	Polygonum plebeium R. Br.	Polygonaceae	Plantae	1200	2200	0.0277778	5	1	LC	FOOD
834	Pomatorhinus erythrogenys Vigors	Timaliidae	Animalia	300	2100	0.0277778	5	1	LC	CULT
835	Ponerorchis chusua (D. Don) Soo	Orchidaceae	Plantae	3300	4300	0.0555556	5	5	NA	SKEL
836	Portulaca oleracea L.	Portulacaceae	Plantae	320	1500	0.0833333	3	1	NA	DGST, FOOD, HEPT, NERV, URIN
837	Potentilla fulgens Wall. ex Sims	Rosaceae	Plantae	1300	4800	0.222222	5	5	NA	CIRC, DERM, DGST, EDCR, FOOD, SKEL, URIN, VETN
838	Potentilla lineata Trevir.	Rosaceae	Plantae	1150	4050	0.111111	5	5	NA	DGST, HEPT, ORAL
839	Potentilla saundersiana Royle	Rosaceae	Plantae	3500	4500	0.0555556	5	1	NA	EDCR, RESP
840	Pothos scandens L.	Araceae	Plantae	300	1000	0.0277778	5	3	NA	DERM
841	Pouzolzia hirta Blume ex Hassk.	Urticaceae	Plantae	465	1700	0.0277778	5	1	NA	VETN
842	Pouzolzia zeylanica (L.) Benn.	Urticaceae	Plantae	300	2400	0.0277778	5	1	NA	VETN
843	Premna barbata Wall. ex Schauer	Lamiaceae	Plantae	300	1500	0.0555556	5	1	NA	DERM, URIN, VETN
844	Premna mollissima Roth	Lamiaceae	Plantae	300	1700	0.0833333	5	1	NA	URIN, VETN
845	Premna serratifolia L.	Lamiaceae	Plantae	300	1700	0.0833333	5	1	NA	DGST, URIN
846	Prinsepia utilis Royle	Rosaceae	Plantae	1500	2900	0.0277778	5	1	NA	FOOD
847	Prunella vulgaris L.	Lamiaceae	Plantae	1200	3800	0.0555556	3	1	NA	ORAL, MTRL, NERV, RESP
848	Prunus cerasoides Buch.-Ham. ex D. Don	Rosaceae	Plantae	800	2200	0.444444	5	5	NA	DERM, FOOD, MENT, ORAL, MTRL, SKEL, URIN
849	Prunus undulata Buch.-Ham. ex D. Don	Rosaceae	Plantae	900	1900	0.111111	5	1	NA	DERM, DGST, FOOD, ORAL, PREG, SKEL, URIN
850	Pseudecheneis sulcata McClelland	Sisoridae	Animalia	300	1065	0.0277778	5	5	NA	FOOD
851	Pseudocaryopteris bicolor (Roxb. ex Hardw.) P.D. Cantino	Lamiaceae	Plantae	300	2100	0.0277778	5	1	NA	DGST
852	Pseudohydnum gelatinosum (Scop.) P. Karst	incertae sedis	Fungi	1800	2500	0.0277778	5	1	NA	FOOD
853	Psidium guajava L.	Myrtaceae	Plantae	300	1700	0.361111	2	1	NA	DGST, FOOD, SKEL
854	Pteridium aquilinum (Desvaux) L. Underwood ex A. Heller	Dennstaedtiaceae	Plantae	300	1500	0.0833333	5	1	NA	DERM
855	Pteris biaurita L.	Pteridaceae	Plantae	300	1500	0.194444	5	1	NA	DERM
856	Pterocephalus hookeri (C. B. Clarke) E. Pritz.	Caprifoliaceae	Plantae	3000	4500	0.0277778	5	1	NA	DGST, HEPT, SKEL
857	Pterospermum acerifolium L. Willd.	Malvaceae	Plantae	400	1900	0.138889	5	5	NA	DERM, DGST, MTRL, URIN
858	Pueraria tuberosa (Willd.) DC.	Fabaceae	Plantae	300	1500	0.0277778	5	5	NA	CIRC, SKEL, URIN
859	Punica granatum L.	Lythraceae	Plantae	300	1700	0.194444	1	5	LC	CIRC, DERM, DGST, FOOD, NERV, OPTH, RESP
860	Pyrularia edulis (Wall.) A. DC.	Santalaceae	Plantae	600	2000	0.111111	5	1	NA	DERM, FOOD, VETN
861	Pyrus hedlundii (C. K. Schneid.) Lacaita	Rosaceae	Plantae	2500	2860	0.111111	5	3	NA	FOOD
862	Quercus lamellosa Sm.	Fagaceae	Plantae	1500	2600	0.138889	5	5	NA	FOOD, MTRL, VETN
863	Quercus lineata Blume	Fagaceae	Plantae	1000	2800	0.138889	5	5	NA	EDCR, FOOD, MTRL
864	Ramaria aurea (Schaeff.) Quel.	Gomphaceae	Fungi	1800	3145	0.0555556	5	1	NA	FOOD
865	Ranunculus diffusus DC.	Ranunculaceae	Plantae	1221	1700	0.0277778	5	3	NA	DERM
866	Rauvolfia vomitoria Afzel.	Apocynaceae	Plantae	900	1200	0.0277778	3	1	NA	ANTI
867	Rauwolfia serpentina Benth. Ex Krz.	Apocynaceae	Plantae	300	1200	0.25	5	5	NA	ANTI, CIRC, MENT, OPTH, VETN
868	Reinwardtia indica Dumort.	Linaceae	Plantae	500	2300	0.0277778	5	1	NA	DERM
869	Remusatia pumila (D. Don) H. Li & A. Hay	Araceae	Plantae	1200	2500	0.0277778	5	1	NA	DERM
870	Rhamnus napalensis (Wall.) M. A. Lawson	Rhamnaceae	Plantae	300	1000	0.0277778	5	7	NA	SKEL
871	Rhaphidophora decursiva (Roxb.) Schott	Araceae	Plantae	1400	2200	0.0833333	5	1	NA	MTRL, SKEL
872	Rhaphidophora glauca (Wall.) Schott	Araceae	Plantae	1400	2200	0.0555556	5	1	NA	MTRL
873	Rheum acuminatum Hook. f. & Thomson	Polygonaceae	Plantae	2800	3700	0.0555556	5	5	NA	CIRC, SKEL
874	Rheum australe D. Don	Polygonaceae	Plantae	3000	4600	0.333333	5	5	NA	DGST, SKEL
875	Rheum emodi Wall.	Polygonaceae	Plantae	2210	4200	0.138889	4	5	NA	FOOD, SKEL
876	Rheum nobile Hook. f. & Thomson	Polygonaceae	Plantae	3600	4900	0.305556	5	6	NA	DGST, FOOD, ORAL, SKEL
877	Rhodiola bupleuroides (Wall. ex. Hook. f. & Thomson) S. H. Fu	Crassulaceae	Plantae	4000	6000	0.111111	5	5	NA	CIRC, EDCR
878	Rhododendron anthopogon D. Don	Ericaceae	Plantae	3000	5500	0.305556	4	2	NA	MTRL, RESP, SPRT
879	Rhododendron arboreum Sm.	Ericaceae	Plantae	1400	3600	0.75	5	1	NA	DGST, FOOD, MTRL, SKEL, VETN
880	Rhododendron barbatum Wall. ex G. Don	Ericaceae	Plantae	2000	3700	0.111111	5	5	NA	MTRL, RESP
881	Rhododendron campanulatum D. Don	Ericaceae	Plantae	3000	3800	0.222222	5	7	NA	MTRL, RESP, SKEL, URIN, VETN
882	Rhododendron cinnabarinum Hook. f.	Ericaceae	Plantae	2500	3500	0.0833333	5	1	NA	MTRL
883	Rhododendron dalhousiae Hook. f.	Ericaceae	Plantae	2100	3200	0.0277778	5	1	NA	MTRL
884	Rhododendron falconeri Hook.f.	Ericaceae	Plantae	2500	3200	0.0833333	5	5	NA	MTRL
885	Rhododendron fulgens Hook.f.	Ericaceae	Plantae	3300	4200	0.0277778	5	1	NA	MTRL
886	Rhododendron grande Wight	Ericaceae	Plantae	1600	2900	0.0555556	5	5	NA	MTRL
887	Rhododendron hodgsonii Hook. f.	Ericaceae	Plantae	2700	3600	0.0833333	5	5	NA	MTRL
888	Rhododendron lepidotum Wall. ex G. Don	Ericaceae	Plantae	2500	5000	0.138889	5	5	NA	MTRL, RESP, SKEL, URIN, VETN
889	Rhododendron setosum D. Don	Ericaceae	Plantae	3000	5500	0.138889	5	1	NA	MTRL, NERV
890	Rhododendron sikkimensis Pradhan & Lachungpa	Ericaceae	Plantae	3200	4300	0.0277778	5	2	NA	SPRT
891	Rhododendron thomsonii Hook.f.	Ericaceae	Plantae	2500	4200	0.0277778	5	1	NA	MTRL
892	Rhus chinensis Mill.	Anacardiaceae	Plantae	900	2700	0.416667	3	1	NA	DGST, EDCR, FOOD, RESP
893	Rhus succedanea L.	Anacardiaceae	Plantae	900	3000	0.333333	5	1	NA	DERM, DGST, FOOD, NEOP, VETN
894	Rhynchostylis retusa L.	Orchidaceae	Plantae	300	1500	0.0555556	5	5	NA	DGST, SKEL
895	Ribes takara D. Don	Grossulariaceae	Plantae	3000	4000	0.0277778	5	3	NA	DERM, DGST
896	Ricinus communis L.	Euphorbiaceae	Plantae	300	2400	0.166667	3	1	NA	DERM, HEPT, URIN
897	Rohdea nepalensis (Raf.) N. Tanaka	Asparagaceae	Plantae	2100	2800	0.0555556	5	5	NA	EDCR
898	Rosa macrophylla Lindl.	Rosaceae	Plantae	2400	3700	0.0833333	5	5	NA	DERM, FOOD, RESP
899	Rosa sericea Wall. ex Lindl.	Rosaceae	Plantae	1700	4600	0.138889	5	1	NA	DERM, DGST, HEPT, OPTH
900	Roscoea purpurea Smith	Orchidaceae	Plantae	2000	2700	0.0555556	5	1	NA	DERM
901	Rotheca serrata (L.) Steane & Mabb.	Lamiaceae	Plantae	300	1500	0.0277778	5	1	NA	DGST
902	Rubia cordifolia L.	Rubiaceae	Plantae	1300	2800	0.5	5	5	NA	CIRC, DERM, EDCR, HEAR, MTRL, OPTH, PREG, SKEL, URIN, VETN
903	Rubia manjith Roxb. ex. Flemming	Rubiaceae	Plantae	1200	2700	0.444444	5	5	NA	DERM, DGST, MTRL, RESP, URIN
904	Rubia wallichiana Decne.	Rubiaceae	Plantae	1800	3500	0.0555556	5	5	NA	DERM, DGST, URIN
905	Rubus barbatus Edgew.	Rosaceae	Plantae	2100	3200	0.0277778	5	1	NA	FOOD
906	Rubus buergeri Miq.	Rosaceae	Plantae	1550	2900	0.0833333	5	1	NA	EDCR, FOOD, URIN
907	Rubus calycinus Wall. ex D. Don	Rosaceae	Plantae	2100	3000	0.111111	5	5	NA	DERM, FOOD
908	Rubus ellipticus Sm.	Rosaceae	Plantae	1400	2500	0.666667	5	5	NA	DERM, DGST, FOOD, HEPT, PREG, RESP, VETN
909	Rubus lineatus Reinw. ex Blume	Rosaceae	Plantae	1800	2700	0.0277778	5	1	NA	FOOD
910	Rubus niveus Thunb.	Rosaceae	Plantae	1221	3000	0.0833333	5	1	NA	FOOD
911	Rubus paniculatus Sm.	Rosaceae	Plantae	1500	3200	0.0555556	5	1	NA	FOOD, RESP, SKEL
912	Rubus pedunculosus D. Don	Rosaceae	Plantae	2200	3300	0.0277778	5	1	NA	FOOD
913	Rubus rugosus Sm.	Rosaceae	Plantae	1800	3000	0.0277778	5	1	NA	FOOD
914	Rumex dentatus L.	Polygonaceae	Plantae	300	1700	0.0277778	3	5	NA	DERM, DGST, HEPT
915	Rumex nepalensis Sreng.	Polygonaceae	Plantae	900	4200	0.722222	5	5	NA	DERM, DGST, FOOD, HEPT, MTRL, SKEL, URIN, VETN
916	Russula puellaris Fr.	Russulaceae	Fungi	1800	2500	0.0555556	5	1	NA	FOOD
917	Russula virescens (Schaeff.) Fr.	Russulaceae	Fungi	1800	2500	0.0277778	5	1	NA	FOOD
918	Russula xerampelina (Schaeff.) Fr.	Russulaceae	Fungi	1800	2500	0.0555556	5	1	NA	FOOD
919	Saccharum bengalense Retz.	Poaceae	Plantae	300	1700	0.0555556	5	1	NA	DGST
920	Saccharum officinarum L.	Poaceae	Plantae	300	1700	0.111111	1	1	NA	DGST, HEPT
921	Saccharum spontaneum L.	Poaceae	Plantae	300	2000	0.0555556	5	1	LC	DGST
922	Salix babylonica L.	Salicaceae	Plantae	2700	3800	0.0555556	4	1	NA	DERM, NERV, SKEL
923	Salix tetrasperma Roxb.	Salicaceae	Plantae	350	1400	0.0555556	5	1	NA	NERV
924	Salvia officinalis L.	Lamiaceae	Plantae	300	2000	0.0833333	1	1	LC	EDCR, FOOD, ORAL
925	Salvia splendens Swllow ex Schult.	Lamiaceae	Plantae	2000	3000	0.0555556	1	1	NA	EDCR
926	Sambucus javanica Blume	Adoxaceae	Plantae	500	2100	0.0555556	5	1	NA	DERM, DGST
927	Sanicula elata Buch.-Ham. ex D. Don	Apiaceae	Plantae	1600	3500	0.0277778	5	1	NA	DERM, DGST
928	Sansevieria zeylanica (L.) Willd.	Asparagaceae	Plantae	500	1450	0.0277778	1	5	NA	RESP, SKEL
929	Sapindus mukorossi Gaertn.	Sapindaceae	Plantae	350	1300	0.25	5	1	NA	DERM, DGST, FOOD, HEPT, NERV, SKEL
930	Saraca asoca (Roxb.) Willd.	Fabaceae	Plantae	300	1400	0.0833333	5	6	VU	EDCR
931	Sarcococca pruniformis Lindl.	Buxaceae	Plantae	2100	3600	0.0277778	5	1	NA	MTRL
932	Sarcopyramis nepalensis Wall.	Melastomataceae	Plantae	300	2800	0.0555556	5	1	NA	DGST, FOOD
933	Satyrium nepalense D.Don	Orchidaceae	Plantae	1000	4000	0.0555556	5	5	NA	EDCR, RESP
934	Saurauia napaulensis DC.	Actinidiaceae	Plantae	750	2150	0.194444	5	5	NA	DGST, FOOD, MTRL
935	Saurauia roxburghii Wall.	Actinidiaceae	Plantae	300	1200	0.0555556	5	1	NA	FOOD, MTRL
936	Saussurea costus (Falc.) Lipsch.	Asteraceae	Plantae	2000	3300	0.111111	5	6	CR	CIRC, HEPT, NERV, OPTH, URIN
937	Saussurea gossipiphora D. Don	Asteraceae	Plantae	3500	5700	0.166667	5	5	NA	DERM, DGST, NERV, SKEL, RESP
938	Saussurea simpsoniana (Field & Gard.) Lipschitz.	Asteraceae	Plantae	4400	5600	0.0555556	5	7	NA	DERM
939	Schefflera elata (D. Don.) Harms	Araliaceae	Plantae	900	1750	0.0555556	5	1	NA	DERM, DGST, PREG
940	Schima wallichii Choisy	Theaceae	Plantae	400	2100	0.472222	5	5	NA	ANTI, DERM, DGST, MTRL, URIN, VETN
941	Schisandra neglecta A. C. Sm.	Schisandraceae	Plantae	900	2000	0.194444	5	1	NA	FOOD
942	Schistura devdevi Hora	Nemacheilidae	Animalia	300	850	0.0277778	5	5	NT	FOOD
943	Schistura rupecula McClelland	Nemacheilidae	Animalia	300	850	0.0277778	5	5	LC	FOOD
944	Schistura scaturigina McClelland	Nemacheilidae	Animalia	300	850	0.0277778	5	5	LC	FOOD
945	Schizothorax progastus McClelland	Cyprinidae	Animalia	300	1065	0.0277778	5	5	LC	FOOD
946	Schizothorax richardsonii J. E. Gray	Cyprinidae	Animalia	300	1065	0.0277778	5	6	VU	FOOD
947	Scindapsus officinalis (Roxb.) Schott	Araceae	Plantae	300	1700	0.0833333	5	1	NA	ANTI, CIRC, DGST, HEAR, RESP
948	Scoparia dulcis L.	Planaginaceae	Plantae	300	2000	0.0555556	3	1	NA	SKEL, URIN
949	Scurrula parasitica L.	Loranthaceae	Plantae	1700	2100	0.0277778	5	5	NA	PREG
950	Sechium edule (Jacq.) Sw.	Cucurbitaceae	Plantae	500	2400	0.111111	1	1	NA	CIRC, FOOD
951	Sedum multicaule Wall. ex Lindl.	Crassulaceae	Plantae	1221	3500	0.0555556	5	5	NA	ANTI
952	Selinum wallichianum (DC.) Raizada & H. O. Saxena	Apiaceae	Plantae	2100	5000	0.111111	1	1	NA	DERM, FOOD, MENT, NERV, RESP, SKEL
953	Semecarpus anacardium L. f.	Anacardiaceae	Plantae	300	1200	0.194444	5	5	NA	DERM, DGST, MENT, NEOP, SKEL, URIN
954	Semiplotus semiplotus McClelland	Cyprinidae	Animalia	300	525	0.0277778	5	7	NA	FOOD
955	Semnopithecus schistaceus Hodgson	Cercopithecidae	Animalia	300	3500	0.0277778	5	5	LC	CIRC, DGST, RESP
956	Senecio scandens Buch.-Ham. ex. D. Don	Asteraceae	Plantae	1800	3600	0.0833333	5	1	NA	DERM, DGST, HEPT
957	Senna alata (L.) Roxb.	Fabaceae	Plantae	300	1200	0.0277778	3	1	NA	MTRL
958	Senna obtusifolia (L.) H.S. Irwin & Barneby	Fabaceae	Plantae	1000	3000	0.0555556	3	1	NA	MTRL
959	Senna occidentalis (L.) Link	Fabaceae	Plantae	300	1400	0.0833333	5	1	NA	MTRL
960	Sesamum indicum L.	Pedaliaceae	Plantae	300	2000	0.0833333	1	1	NA	DERM, DGST, ORAL, OPTH, URIN
961	Setaria palmifolia (J.Koenig) Stapf	Poaceae	Plantae	300	1800	0.0277778	3	5	NA	MTRL
962	Shorea robusta Gaertn.	Dipterocarpaceae	Plantae	300	1500	0.194444	5	5	LC	ANTI, CIRC, DERM, DGST, FOOD, MTRL
963	Sida acuta Burm. f.	Malvaceae	Plantae	300	1400	0.0555556	3	1	NA	DERM, EDCR, URIN
964	Sida cordifolia L.	Malvaceae	Plantae	300	1400	0.0833333	5	1	NA	DGST
965	Sida rhombifolia L.	Malvaceae	Plantae	300	2100	0.0555556	5	1	NA	EDCR, RESP
966	Sigesbeckia orientalis L.	Asteraceae	Plantae	300	2700	0.0833333	3	1	NA	DERM, DGST, HEPT
967	Sinopodophyllum hexandrum (Royle) T. S. Ying var. jaeschkei Chatterjee & Mukherjee	Berberidaceae	Plantae	2800	4500	0.638889	5	6	NA	CIRC, DGST, FOOD, HEPT, URIN, VETN
968	Siphocranion macranthum (Hook. f.) C. Y. Wu	Lamiaceae	Plantae	1300	2200	0.0277778	5	1	NA	DERM
969	Skimmia laureola Franch.	Rutaceae	Plantae	2400	3000	0.0277778	4	1	NA	SPRT
970	Smilax aspera L.	Smilacaceae	Plantae	1200	3200	0.111111	5	1	NA	DGST, URIN
971	Smilax elegans Wall. ex Kunth	Smilacaceae	Plantae	1800	3100	0.0555556	5	1	NA	URIN
972	Smilax lanceifolia Roxb.	Smilacaceae	Plantae	1800	2800	0.0277778	5	1	NA	URIN
973	Smilax ovalifolia Roxb. ex. D. Don	Smilacaceae	Plantae	300	1800	0.0833333	5	1	NA	CIRC, FOOD, URIN
974	Smilax perfoliata Lour.	Smilacaceae	Plantae	800	1200	0.0277778	5	1	NA	CIRC, DGST, URIN
975	Smilax zeylanica L.	Smilacaceae	Plantae	300	1500	0.111111	5	5	NA	DERM, DGST, URIN
976	Solanum aculeatissimum Jacq.	Solanaceae	Plantae	600	2300	0.138889	3	1	NA	CIRC
977	Solanum americanum Mill.	Solanaceae	Plantae	900	2900	0.0277778	3	1	NA	DERM
978	Solanum anguivi Lam.	Solanaceae	Plantae	300	2500	0.0555556	3	1	NA	CIRC, DERM, DGST
979	Solanum dulcamara L.	Solanaceae	Plantae	500	3500	0.0555556	3	1	NA	DERM
980	Solanum erianthum D. Don	Solanaceae	Plantae	300	1500	0.0555556	3	1	NA	DERM
981	Solanum melongena L.	Solanaceae	Plantae	300	1700	0.166667	1	1	NA	FOOD
982	Solanum torvum Sw.	Solanaceae	Plantae	300	1750	0.111111	1	1	NA	DGST, FOOD, MTRL, URIN
983	Solanum tuberosum L.	Solanaceae	Plantae	300	2500	0.0555556	3	5		FOOD, OPTH
984	Solanum viarum Dunal	Solanaceae	Plantae	1400	2200	0.111111	3	5	NA	DERM, DGST, ORAL, RESP
985	Sonchus oleraceus (L.) L.	Asteraceae	Plantae	1700	3200	0.0555556	3	1	NA	DGST, HEPT, URIN
986	Sonchus wightianus DC.	Asteraceae	Plantae	1300	2500	0.0833333	5	5	NA	DGST, HEPT, RESP, URIN
987	Sorbus cuspidata (Spach) Hedl.	Rosaceae	Plantae	2400	3300	0.0277778	5	1	NA	FOOD, HEPT, ORAL
988	Spermadictyon suaveolens Roxb.	Rubiaceae	Plantae	700	2300	0.0277778	5	1	NA	MTRL
989	Sphaeranthus indicus L.	Asteraceae	Plantae	300	1500	0.0555556	5	5	LC	DGST, MTRL, NERV
990	Sphaerias blanfordi Thomson	Pteropodidae	Animalia	1000	1685	0.0277778	5	7	LC	DGST
991	Sphagnum squarrosum Crome	Sphagnaceae	Plantae	500	2800	0.0555556	5	1	NA	DERM, MTRL
992	Spilanthes acmella (L.) L.	Asteraceae	Plantae	300	1700	0.0833333	3	5	NA	DERM, ORAL, NERV, URIN
993	Spiranthes sinensis (Per.) Ames	Orchidaceae	Plantae	300	2000	0.0277778	5	5	LC	DERM, ORAL, NERV, URIN
994	Spondias pinnata (L.f.) Kurz	Anacardiaceae	Plantae	300	1500	0.0833333	5	5	NA	CIRC, DGST, EDCR, FOOD, ORAL, HEAR, SKEL
995	Stellaria chamaejasme L.	Thymelaeaceae	Plantae	2700	4300	0.0555556	5	5	NA	SKEL
996	Stellaria media (L.) Vill.	Caryophyllaceae	Plantae	900	2800	0.0277778	3	1	NA	DERM, FOOD, RESP
997	Stellaria patens D. Don	Caryophyllaceae	Plantae	1221	4000	0.0833333	5	5	NA	DERM
998	Stenochlaena palustris (Burm. F.) Bedd.	Blechnaceae	Plantae	300	1000	0.0277778	5	3	NA	FOOD
999	Stenoseris graciliflora (Wall. ex DC.) C. Shih	Asteraceae	Plantae	2000	3700	0.0277778	5	1	NA	DERM
1000	Stephania elegans Hook. f. .& Thomson	Menispermaceae	Plantae	1200	2130	0.0555556	5	5	NA	URIN
1001	Stephania glabra (Roxb.) Miers	Menispermaceae	Plantae	300	2200	0.416667	5	5	NA	DGST, EDCR, RESP, VETN
1002	Stephania hernandifolia Walp.	Menispermaceae	Plantae	300	1500	0.222222	5	5	NA	DERM, DGST, FOOD, URIN
1003	Stephania wightii Dunn	Menispermaceae	Plantae	500	1000	0.0277778	5	7	NA	DGST
1004	Sterculia fulgens Wall.	Malvaceae	Plantae	400	1500	0.0555556	5	1	NA	FOOD
1005	Sterculia indica Merr.	Malvaceae	Plantae	300	1100	0.0277778	5	1	NA	FOOD
1006	Sterculia pallens Wall. ex Hochr.	Malvaceae	Plantae	300	1000	0.0277778	5	3	NA	FOOD
1007	Sterculia villosa Roxb. ex Sm.	Malvaceae	Plantae	300	900	0.0833333	5	3	NA	EDCR, FOOD, SKEL
1008	Stereocaulon foliolosum var. strictum (Bab.) Lamb.	Stereocaulaceae	Fungi	2400	3600	0.0277778	5	1	NA	FOOD
1009	Stereocaulon himalayense Awasthi & Lamb.	Stereocaulaceae	Fungi	2500	5400	0.0277778	5	1	NA	FOOD
1010	Stereospermum chelonoides (L .f) DC	Bignoniaceae	Plantae	300	700	0.0555556	5	7	NA	DERM, DGST, NERV
1011	Streptolirion volubile Edgew.	Commelinaceae	Plantae	1600	2800	0.0277778	5	1	NA	DGST
1012	Strobilomyces floccopus (Vahl) P. Karst	Boletaceae	Fungi	1800	2500	0.0277778	5	1	NA	FOOD
1013	Sus scrofa domesticus Erx.	Suidae	Animalia	300	2500	0.0277778	1	5	NA	DERM, FOOD, SKEL
1014	Swertia angustifolia Buch.-Ham. ex.D. Don	Gentianaceae	Plantae	1600	2600	0.111111	5	6	NA	EDCR
1015	Swertia bimaculata (Siebold & Zucc.) Hook. f. & Thomson ex C. B. Clarke	Gentianaceae	Plantae	1300	3300	0.0555556	5	5	NA	CIRC, HEPT, SKEL, URIN
1016	Swertia chirayita (Roxb.) Buch.-Ham. ex C. B. Clarke	Gentianaceae	Plantae	1200	3200	1	4	5	NA	DERM, DGST, EDCR, FOOD, HEPT, OPTH, RESP, URIN, VETN
1017	Swertia hookeri C.B. Clarke	Gentianaceae	Plantae	3000	4300	0.0555556	5	5	NA	SKEL
1018	Swertia multicaulis D. Don	Gentianaceae	Plantae	3600	5200	0.111111	5	5	NA	DGST, NERV, RESP, SKEL
1019	Swertia pedicellata Banerji	Gentianaceae	Plantae	2200	3000	0.0833333	5	1	NA	EDCR
1020	Swertia thomsonii C .B. Clarke	Gentianaceae	Plantae	2700	4350	0.0277778	5	5	NA	DGST, HEPT, RESP
1021	Symploccos theifolia (L. f.) Oken	Symplocaceae	Plantae	2000	3500	0.138889	5	1	NA	MTRL
1022	Symplocos glomerata King ex C. B. Clarke	Symplocaceae	Plantae	2000	2500	0.0277778	5	3	NA	MTRL
1023	Symplocos lucida (Thunb.) Siebold & Zucc.	Symplocaceae	Plantae	1200	3500	0.0277778	5	1	NA	FOOD, MTRL
1024	Symplocos ramosissima Wall. ex. G. Don	Symplocaceae	Plantae	1400	2700	0.0555556	5	2	NA	ORAL, MTRL, OPTH, SKEL
1025	Syndrella noidflora (L.) Gaertn.	Asteraceae	Plantae	300	900	0.0833333	3	3	NA	DERM, MTRL, SKEL
1026	Syzygium claviflorum (Roxb.) Wall. ex A.M. Cowan & Cowan	Myrtaceae	Plantae	300	1000	0.0277778	5	3	NA	FOOD
1027	Syzygium cumini (L.) Skeels	Myrtaceae	Plantae	350	1500	0.138889	5	1	NA	EDCR, ORAL, MTRL, RESP
1028	Syzygium jambos (L.) Alston	Myrtaceae	Plantae	360	1700	0.0833333	1	1	NA	FOOD
1029	Syzygium kurzii (Duthie) N. P. Balakr.	Myrtaceae	Plantae	300	1700	0.0277778	1	1	NA	FOOD
1030	Syzygium nervosum A. Cunn. ex DC.	Myrtaceae	Plantae	300	1500	0.0277778	1	1	NA	FOOD
1031	Syzygium tetragonum (Wight) Wall. ex Walp.	Myrtaceae	Plantae	600	1500	0.0277778	1	1	NA	FOOD
1032	Tagetes erecta L.	Asteraceae	Plantae	300	2000	0.111111	2	1	NA	DERM, DGST, FOOD, OPTH
1033	Tamarindus indica L.	Fabaceae	Plantae	300	900	0.222222	4	3	NA	EDCR, FOOD, OPTH, RESP, SKEL, URIN
1034	Taraxacum campylodes G.E. Haglund	Asteraceae	Plantae	300	1400	0.138889	3	5	NA	DERM, HEPT, SKEL, URIN
1035	Taxus wallichiana Zucc.	Taxaceae	Plantae	1500	3400	0.472222	5	6	EN	CIRC, DGST, EDCR, FOOD, HEPT, MENT, NEOP, NERV, RESP, URIN, VETN
1036	Tectaria cicutaria (L.) Copel	Tectariaceae	Plantae	500	1300	0.0833333	5	5	NA	DERM
1037	Tectaria gemmifera (Fee) Alston	Tectariaceae	Plantae	300	1800	0.0833333	5	5	NA	DERM, FOOD, SKEL, URIN
1038	Tectaria macrodonta C. Chr.	Tectariaceae	Plantae	300	1800	0.0833333	5	5	NA	DERM, DGST, EDCR, RESP
1039	Terminalia bellirica (Gaertn.) Roxb.	Combretaceae	Plantae	300	1400	0.5	4	1	NA	CIRC, DERM, DGST, EDCR, FOOD, ORAL, MTRL, OPTH, RESP, SKEL, VETN
1040	Terminalia chebula Retz.	Combretaceae	Plantae	300	1300	0.583333	4	1	NA	CIRC, DGST, EDCR, FOOD, ORAL, MTRL, OPTH, SKEL, URIN, VETN
1041	Terminalia myriocarpa Van Heurck & Mull. Arg.	Combretaceae	Plantae	400	1500	0.25	5	1	NA	CIRC, DERM, HEPT, MTRL, URIN
1042	Termitomyces clypeatus R. Heim	Lyophyllaceae	Fungi	300	2500	0.0277778	5	1	NA	FOOD
1043	Termitomyces eurhizus (Berk.) R. Heim	Lyophyllaceae	Fungi	300	2500	0.0555556	5	1	NA	FOOD
1044	Termitomyces heimii Natarajan	Lyophyllaceae	Fungi	300	2500	0.0277778	5	1	NA	FOOD
1045	Termitomyces mammiformis R. Heim.	Lyophyllaceae	Fungi	300	2500	0.0277778	5	1	NA	FOOD
1046	Termitomyces medius R. Heim & Grasse	Lyophyllaceae	Fungi	300	2954	0.0555556	5	1	NA	FOOD
1047	Termitomyces microcarpus (Berk. & Broome) R. Heim	Lyophyllaceae	Fungi	300	2500	0.0277778	5	1	NA	FOOD
1048	Tetragonula iridipennis Smith	Apidae	Animalia	300	1500	0.0555556	5	5	NA	DERM
1049	Tetrastigma bracteolatum (Wall.) Planch.	Vitaceae	Plantae	1320	1500	0.0277778	5	3	NA	FOOD
1050	Tetrastigma rumicispermum (M. A. Lawson) Planch.	Vitaceae	Plantae	1500	2250	0.0555556	5	1	NA	FOOD
1051	Tetrastigma serrulatum (Roxb.) Planch.	Vitaceae	Plantae	950	2900	0.0277778	5	1	NA	SKEL
1052	Thalictrum foliolosum DC.	Ranunculaceae	Plantae	1221	3400	0.194444	5	5	NA	DGST, HEPT, ORAL, NERV, OPTH, SKEL, URIN
1053	Theropogon pallidus (Wall. ex. Kunth) Maxim.	Asparagaceae	Plantae	1800	2700	0.0277778	5	5	NA	FOOD
1054	Thunbergia coccinea Wall.	Acanthaceae	Plantae	1500	2450	0.0555556	5	1	NA	DGST
1055	Thunbergia grandiflora (Roxb. ex Rottl.) Roxb.	Acanthaceae	Plantae	300	1300	0.0277778	5	1	NA	DGST
1056	Thunbergia lutea T. Anderson	Acanthaceae	Plantae	900	2300	0.0277778	5	1	NA	PREG
1057	Thysanolaena latifolia (Roxb, ex. Hornem.) Honda.	Poaceae	Plantae	300	2000	0.583333	5	5	NA	DERM, EDCR, ORAL, MTRL
1058	Tinospora sinensis (Lour.) Merr.	Menispermaceae	Plantae	300	1400	0.111111	5	1	NA	DERM, HEPT, SKEL, RESP
1059	Tithonia diversifolia (Hemsl.) A. Gray	Asteraceae	Plantae	800	1500	0.0277778	3	1	NA	DERM
1060	Toddalia asiatica (L.) Lam.	Rutaceae	Plantae	400	2050	0.0833333	5	5	NA	SKEL
1061	Toona ciliata M. Roem	Meliaceae	Plantae	300	1800	0.361111	5	1	LC	DGST, MTRL, RESP
1062	Tor putitora F. Hamilton	Cyprinidae	Animalia	300	525	0.0277778	5	8	EN	FOOD
1063	Tor tor F. Hamilton	Cyprinidae	Animalia	300	800	0.0277778	5	7	NT	FOOD
1064	Toxicodendron hookeri (K. C. Sahni & Bahadur) C. Y. Wu & T. L. Ming	Anacardiaceae	Plantae	1200	2600	0.0277778	5	1	NA	DERM
1065	Toxicodendron wallichii (Hook. f.) Kuntze	Anacardiaceae	Plantae	1000	2400	0.0277778	5	1	NA	DERM
1066	Trachelospermum lucidum (D. Don) K. Schum	Apocynaceae	Plantae	600	1200	0.111111	5	1	NA	DERM, DGST, EDCR
1067	Tremella mesenterica Retz.	Tremeliaceae	Fungi	1800	2500	0.0555556	5	1	NA	FOOD
1068	Trichosanthes cucumerina L.	Cucurbitaceae	Plantae	800	2500	0.138889	1	5	NA	ANTI, DERM, DGST, FOOD, URIN
1069	Trichosanthes lepiniana (Naudin.) Cogn.	Cucurbitaceae	Plantae	400	1600	0.138889	5	5	NA	DGST, FOOD, PREG, RESP, VETN
1070	Trichosanthes tricuspidata Lour.	Cucurbitaceae	Plantae	300	1700	0.111111	5	5	NA	DGST, ORAL
1071	Tridax procumbens (L.) L.	Asteraceae	Plantae	300	1500	0.0555556	5	1	NA	DERM, DGST
1072	Trigonella foenum-graecum L.	Fabaceae	Plantae	300	1700	0.25	1	1	NA	DERM, DGST, EDCR, FOOD, SKEL
1073	Tropidia curcugiloides Lindl.	Orchidaceae	Plantae	300	1000	0.0555556	5	3	NA	DGST
1074	Tsuga dumosa (D. Don) Eichler	Pinaceae	Plantae	2400	3600	0.0555556	5	1	NA	MTRL
1075	Tupistra nutans Wall. ex Lindl.	Asparagaceae	Plantae	900	1800	0.527778	5	5	NA	DGST, EDCR, FOOD, NERV, SKEL, URIN
1076	Turpinia pomifera (Roxb.) DC.	Staphyleaceae	Plantae	500	1200	0.0277778	5	1	NA	FOOD
1077	Urena lobata L.	Malvaceae	Plantae	300	1500	0.111111	3	1	NA	DGST, ORAL, NEOP, RESP
1078	Urocissa erythrorhyncha Bod.	Corvidae	Animalia	1500	2000	0.0833333	5	7	NA	DGST, RESP
1079	Ursus thibetanus G. Cuvier	Ursidae	Animalia	2000	4250	0.111111	5	6	VU	RESP
1080	Urtica dioica L.	Urticaceae	Plantae	1800	2800	0.805556	5	5	NA	ANTI, CIRC, DERM, EDCR, FOOD, HEPT, SKEL, URIN, VETN
1081	Urtica parviflora Roxb.	Urticaceae	Plantae	1900	2400	0.305556	5	5	NA	CIRC, FOOD, ORAL, PREG, SKEL, URIN
1082	Usnea baileyi (Stirt.) Zahlbr.	Parmeliaceae	Fungi	1500	2400	0.0555556	5	5	NA	RESP
1083	Usnea sikkimensis Biswas	Parmeliaceae	Fungi	2500	3300	0.0833333	5	5	NA	RESP
1084	Vaccinium glaucoalbum Hook. f. ex C. B. Clarke	Ericaceae	Plantae	2500	3300	0.0277778	5	1	NA	FOOD, MTRL
1085	Vaccinium nummularia Hook. f. & Thomson ex C. B. Clarke	Ericaceae	Plantae	2000	3500	0.0277778	5	5	NA	FOOD
1086	Vaccinium retusum (Griff.) Hook. f. ex C. B. Clarke	Ericaceae	Plantae	2100	2800	0.0277778	5	1	NA	FOOD
1087	Vaccinium vacciniaceum (Roxb.) Sleumer	Ericaceae	Plantae	1200	3202	0.0555556	5	1	NA	FOOD
1088	Valeriana hardwickii Wall.	Caprifoliaceae	Plantae	2300	3600	0.222222	5	6	NA	DERM, FOOD, HEPT, SKEL, URIN
1089	Valeriana jatamansi Jones	Caprifoliaceae	Plantae	1500	3600	0.25	4	6	NA	DGST, MENT, MTRL, NERV, SPIRT
1090	Vallaris solanacea (Roth) Kuntze	Apocynaceae	Plantae	300	1400	0.0555556	5	1	NA	ANTI, DERM
1091	Vanda coerulea Griff. ex. Lindl	Orchidaceae	Plantae	1000	1600	0.0555556	5	7	NA	DGST
1092	Vanda cristata Wall. ex Lindl.	Orchidaceae	Plantae	700	1000	0.138889	5	7	NA	DERM, ORAL, SKEL, VETN
1093	Vanda tessellata (Roxb.) Hook. ex G. Don	Orchidaceae	Plantae	300	1700	0.0277778	5	5	LC	VETN
1094	Vanda testacea (Lindl.) Rchb. f.	Orchidaceae	Plantae	500	2000	0.0277778	5	5	NA	VETN
1095	Verbascum thapsus L.	Scrophulariaceae	Plantae	1800	4000	0.0277778	3	1	NA	CIRC, DGST, RESP
1096	Verbena officinalis L.	Verbenaceae	Plantae	900	2400	0.0277778	3	1	NA	HEPT, NERV
1097	Veronica wyomingensis (A. Nelson) M.M.Mart.Ort. & Albach	Plantaginaceae	Plantae	-	-	0.0277778	5	1		DGST
1098	Viburnum erubescens Wall.	Adoxaceae	Plantae	1500	2000	0.0277778	5	3	NA	FOOD
1099	Viola betonicifolia Sm.	Violaceae	Plantae	1400	2800	0.0277778	5	1	NA	RESP
1100	Viola biflora L.	Violaceae	Plantae	2500	4500	0.0277778	5	1	NA	RESP
1101	Viola diffusa Ging.	Violaceae	Plantae	900	2000	0.111111	5	1	NA	DERM, RESP
1102	Viola glaucescens Oudem.	Violaceae	Plantae	2100	2400	0.0277778	5	3	NA	DERM, RESP
1103	Viola pilosa Blume	Violaceae	Plantae	1500	3500	0.0833333	5	1	NA	DERM, DGST, RESP
1104	Viola thomsonii Oudem.	Violaceae	Plantae	800	2400	0.0555556	5	1	NA	DERM, DGST
1105	Viscum album L.	Viscaceae	Plantae	1221	2700	0.166667	3	5	NA	CIRC, SKEL
1106	Viscum articulatum Burm. f.	Viscaceae	Plantae	1000	2200	0.583333	5	5	NA	DERM, DGST, FOOD, SKEL, URIN, VETN
1107	Vitex negundo L.	Lamiaceae	Plantae	300	1700	0.305556	3	1	NA	DGST, EDCR, ORAL, HEAR, SKEL, VETN
1108	Vulpes bengalensis Shaw	Canidae	Animalia	300	2000	0.0555556	5	5	LC	DGST, RESP
1109	Wallichia disticha T. Anderson	Arecaceae	Plantae	300	1300	0.0277778	5	5	NA	FOOD
1110	Woodfordia fruticosa (L.) Kurz	Lythraceae	Plantae	300	1800	0.25	5	1	LC	DGST, HEPT, URIN, VETN
1111	Wrightia arborea (Dennst.) Mabb.	Apocynaceae	Plantae	400	1000	0.0833333	5	7	NA	ANTI, DERM, DGST, EDCR, HEPT, ORAL, PREG, URIN
1112	Xanthium strumarium L.	Asteraceae	Plantae	300	2500	0.0555556	3	1	NA	DERM, SKEL
1113	Xenophrys spp.	Megophyridae	Animalia	-	-	0.0277778	5	5	-	DERM
1114	Xerula radicata (Relhan) Dorfelt	Physalacriaceae	Fungi	1800	2500	0.0277778	5	1	NA	FOOD
1115	Yushania maling (Gamble) R.B. Majumdar & Karthik	Poaceae	Plantae	1500	3600	0.222222	5	1	NA	FOOD, MTRL, VETN
1116	Yushania microphylla (Munro) R. B. Majumdar	Poaceae	Plantae	2300	3000	0.0833333	5	1	NA	MTRL
1117	Zanthoxylum acanthopodium DC.	Rutaceae	Plantae	1240	2440	0.583333	5	1	NA	DGST, FOOD, MENT, ORAL, HEAR, OPTH, SKEL
1118	Zanthoxylum armatum DC.	Rutaceae	Plantae	300	3500	0.305556	5	1	NA	DGST, MENT, ORAL, HEAR, MTRL, OPTH
1119	Zanthoxylum budranga DC.	Rutaceae	Plantae	1000	3000	0.0833333	5	5	NA	CIRC, DGST, ORAL, MTRL, RESP, SKEL
1120	Zanthoxylum nitidum (Roxb.) DC.	Rutaceae	Plantae	900	2700	0.111111	5	1	NA	DGST, FOOD, MENT, ORAL, HEAR, MTRL, NERV, OPTH, SKEL
1121	Zanthoxylum oxyphyllum Edgew.	Rutaceae	Plantae	300	1500	0.138889	5	1	NA	CIRC, DGST
1122	Zanthoxylum rhetsa DC.	Rutaceae	Plantae	300	930	0.111111	5	3	NA	CIRC, DGST, FOOD, ORAL
1123	Zea mays L.	Poaceae	Plantae	300	2500	0.138889	1	1	NA	DERM, FOOD
1124	Zephyranthes carinata Herb.	Amaryllidaceae	Plantae	400	2400	0.0555556	5	1	NA	DERM, DGST
1125	Zingiber chrysanthum Roscoe	Zingiberaceae	Plantae	500	1800	0.0555556	5	5	NA	DGST, SKEL, RESP
1126	Zingiber officinale Roscoe	Zingiberaceae	Plantae	300	1300	0.472222	4	5	NA	DERM, DGST, EDCR, FOOD, ORAL, NERV, SKEL, RESP, VETN
1127	Zingiber zerumbet (L.) Roscoe ex Sm.	Zingiberaceae	Plantae	300	700	0.0555556	5	7	NA	DERM, NERV, RESP
1128	Ziziphus jujuba Mill.	Rhamnaceae	Plantae	300	900	0.0833333	5	7	LC	DGST, EDCR, FOOD, SKEL
